# Supplementary material for: Metal-free B4@g-C3N4: a potential electrocatalyst for highly selective and efficient conversion of CO to ethanol
Source: Royal Society of Chemistry journal article supplement (doi:10.1039/d3ta03591c), 2023-01-01
Supplement: d3ta03591c1.pdf [file d3ta03591c1.pdf]

## Supporting information

# Metal-free B<sub>4</sub>@g-C<sub>3</sub>N<sub>4</sub>: a potential electrocatalyst for highly selective and efficient conversion of CO to ethanol

RECEIVED DATE (xxxx-xx)

CORRESPONDING AUTHOR FOOTNOTE \* To whom correspondence should be addressed. E-mail: [malijuan19852223@163.com](mailto:malijuan19852223@163.com) (Li-Juan Ma)

Table S1: Calculation of the binding energy and molar formation energy of B<sub>4</sub>@g-C<sub>3</sub>N<sub>4</sub>

|                                                                           | Calculation formula                                                                                                                        | Corresponding value |
|---------------------------------------------------------------------------|--------------------------------------------------------------------------------------------------------------------------------------------|---------------------|
| Binding energy of B <sub>4</sub> on g-C <sub>3</sub> N <sub>4</sub>       | $E_b = E(\text{B}_4@\text{g-C}_3\text{N}_4) - 4 * E(\text{B in B}_{12}) - E(\text{g-C}_3\text{N}_4)$                                       | -6.51               |
| molar formation energy of B <sub>4</sub> @g-C <sub>3</sub> N <sub>4</sub> | $\Delta E_f = [E(\text{B}_4@\text{g-C}_3\text{N}_4) - 4 * E(\text{B atom}) - 24 * E(\text{C in graphene}) - 32 * E(\text{N in N}_2)] / 60$ | -6.19               |
| molar formation energy of B <sub>12</sub>                                 | $\Delta E_f = [E(\text{B}_{12}) - 12 * E(\text{B})] / 12$                                                                                  | -5.13               |
| molar formation energy of B <sub>4</sub> @g-C <sub>3</sub> N <sub>4</sub> | $\Delta E_f = [E(\text{B}_4@\text{g-C}_3\text{N}_4) - 4 * E(\text{B in B}_{12}) - 24 * E(\text{C}) - 32 * E(\text{N})] / 60$               | -2.74               |

We evaluate the thermal stability of B<sub>4</sub>@g-C<sub>3</sub>N<sub>4</sub> catalyst by calculating the binding energy and molar formation energy.

Binding energy is defined as:

$$E_b = E(\text{B}_4@\text{g-C}_3\text{N}_4) - 4 * E(\text{B}) - E(\text{g-C}_3\text{N}_4) \quad (1),$$

Where  $E(\text{B}_4@\text{g-C}_3\text{N}_4)$ ,  $E(\text{B in B}_{12})$  and  $E(\text{g-C}_3\text{N}_4)$  are the total energy of B<sub>4</sub>@g-C<sub>3</sub>N<sub>4</sub> system, B atom (the average B atom energy in the most stable B<sub>12</sub> phase), and the original g-C<sub>3</sub>N<sub>4</sub>, respectively. Note that the more negative the binding energy, the higher the stability. Our calculations show that the binding energy of B<sub>4</sub> on g-C<sub>3</sub>N<sub>4</sub> is -6.51 eV, while that of a single B atom is positive (0.42 eV), indicating that doping of B<sub>4</sub> clusters on g-C<sub>3</sub>N<sub>4</sub> is easier than single B atom.

A molar formation energy  $\Delta E_f$  for B<sub>4</sub>@g-C<sub>3</sub>N<sub>4</sub> can be defined as:

$$E_f = E(\text{B}_4@\text{g-C}_3\text{N}_4) - \sum \chi_i \mu_i \quad (2),$$

where  $\chi_i$  is the molar fraction of atom  $i$  ( $i = \text{B, C, and N}$ ), and  $\mu_i$  is the chemical potential of the constituent. The B<sub>4</sub>@g-C<sub>3</sub>N<sub>4</sub> cell contains 4 B, 24 C, and 32 N atoms. If the energy of atom B is defined as the chemical potential of a single B atom, the molar formation energy of the most stable phase B<sub>12</sub> and B<sub>4</sub>@g-C<sub>3</sub>N<sub>4</sub> is -5.13 eV, and

-6.19 eV, which indicates that  $B_4@g-C_3N_4$  is thermally stable relative to the most stable phase of  $B_{12}$ . If the chemical potential of B is defined as the cohesion energy of each atom on  $B_{12}$ . The molar formation energy  $\Delta E_f$  of  $B_4@g-C_3N_4$  is -2.74 eV, which is still negative. All the above data show that the  $B_4@g-C_3N_4$  system has higher stability than their corresponding constituents, which indicates the feasibility of its formation.

Table S2 The total adsorption energy,  $E_{\text{ads}}(\text{total})$ ; average adsorption energy,  $E_{\text{ads}}(\text{ave})$  and continuous adsorption energy  $E_{\text{ads}}(\text{con})$  of CO on  $\text{B}_4@\text{g-C}_3\text{N}_4$  catalyst.

|     | $E/\text{eV}$ | $E_{\text{ads}}(\text{total})/\text{eV}$ | $E_{\text{ads}}(\text{ave})/\text{eV}$ | $E_{\text{ads}}(\text{con})/\text{eV}$ | $G/\text{eV}$ |
|-----|---------------|------------------------------------------|----------------------------------------|----------------------------------------|---------------|
| CO  | -517.73       | -1.16                                    | -1.16                                  | -1.16                                  | -0.58         |
| 2CO | -532.74       | -1.40                                    | -0.70                                  | -0.24                                  | -0.36         |
| 3CO | -547.64       | -1.53                                    | -0.51                                  | -0.13                                  | 0.04          |
| 4CO | -562.28       | -1.40                                    | -0.35                                  | 0.13                                   | 0.66          |

Table S3 Calculated the zero-point energy correction, entropy, enthalpy temperature correction, and the total free energy correction of different adsorption species on the B<sub>up</sub> site in the process of C1 path are calculated on the B<sub>4</sub>@g-C<sub>3</sub>N<sub>4</sub>, respectively. \* is the active site.

| Species              | $E_{ZPE}(eV)$ | $-TS(eV)$ | $\int C_{pd}T(eV)$ | $G-E_{elec}(eV)$ |
|----------------------|---------------|-----------|--------------------|------------------|
| <b>*C species</b>    |               |           |                    |                  |
| *CO                  | 0.23          | -0.09     | 0.04               | 0.18             |
| *CHO                 | 0.48          | -0.11     | 0.05               | 0.43             |
| *COH                 | 0.48          | -0.18     | 0.08               | 0.39             |
| *CH <sub>2</sub> O   | 0.72          | -0.17     | 0.07               | 0.63             |
| *CHOH                | 0.83          | -0.12     | 0.07               | 0.78             |
| *CH <sub>2</sub> OH  | 1.10          | -0.15     | 0.08               | 1.03             |
| *+CH <sub>3</sub> OH | 1.37          | -0.27     | 0.12               | 1.22             |
| *CH <sub>2</sub>     | 0.72          | -0.04     | 0.03               | 0.71             |
| *CH <sub>3</sub>     | 0.98          | -0.12     | 0.06               | 0.92             |
| *+CH <sub>4</sub>    | 1.21          | -0.20     | 0.08               | 1.09             |
| <b>*O species</b>    |               |           |                    |                  |
| *CO                  | 0.23          | -0.09     | 0.04               | 0.18             |
| *CHO                 | 0.48          | -0.11     | 0.05               | 0.43             |
| *COH                 | 0.48          | -0.18     | 0.08               | 0.39             |
| *OCH <sub>2</sub>    | 0.77          | -0.12     | 0.07               | 0.71             |
| *OCH <sub>3</sub>    | 1.10          | -0.14     | 0.07               | 1.03             |
| *OHCH <sub>2</sub>   | 1.04          | -0.20     | 0.10               | 0.95             |
| *+CH <sub>3</sub> OH | 1.42          | -0.20     | 0.10               | 1.31             |
| *O+CH <sub>4</sub>   | 1.32          | -0.19     | 0.09               | 1.22             |
| *OH+CH <sub>4</sub>  | 1.60          | -0.30     | 0.14               | 1.44             |
| *+CH <sub>4</sub>    | 1.20          | -0.22     | 0.09               | 1.07             |
| H <sub>2</sub> (g)   | 0.27          | -0.12     | 0.05               | 0.19             |
| CO(g)                | 0.13          | -0.61     | 0.09               | -0.39            |

Table S4 Free energy change for each possible radical reaction in the electrochemical for the reduction of CO to CH<sub>4</sub> on the B<sub>up</sub> site of B<sub>4</sub>@g-C<sub>3</sub>N<sub>4</sub> at U = 0 V for the process of C1 path.

| Primitive response                                                                                     | Free energy change ( $\Delta G/eV$ ) |
|--------------------------------------------------------------------------------------------------------|--------------------------------------|
| *C species                                                                                             |                                      |
| * + CO(g) $\rightarrow$ *CO                                                                            | -0.58                                |
| *CO + H <sup>+</sup> + e <sup>-</sup> $\rightarrow$ *CHO + *CO                                         | 0.006                                |
| *CO + H <sup>+</sup> + e <sup>-</sup> $\rightarrow$ *COH + *CO                                         | 2.28                                 |
| *CHO + H <sup>+</sup> + e <sup>-</sup> $\rightarrow$ *CH <sub>2</sub> O                                | 0.86                                 |
| *CHO + H <sup>+</sup> + e <sup>-</sup> $\rightarrow$ *CHOH                                             | -0.32                                |
| *CHOH + H <sup>+</sup> + e <sup>-</sup> $\rightarrow$ *CH <sub>2</sub> OH                              | 0.16                                 |
| *CH <sub>2</sub> OH + H <sup>+</sup> + e <sup>-</sup> $\rightarrow$ *+CH <sub>3</sub> OH               | 0.23                                 |
| *CH <sub>2</sub> OH + H <sup>+</sup> + e <sup>-</sup> $\rightarrow$ *CH <sub>2</sub> +H <sub>2</sub> O | -1.25                                |
| *CH <sub>2</sub> + H <sup>+</sup> + e <sup>-</sup> $\rightarrow$ *CH <sub>3</sub>                      | 0.13                                 |
| *CH <sub>3</sub> + H <sup>+</sup> + e <sup>-</sup> $\rightarrow$ *CH <sub>4</sub>                      | 0.21                                 |
| *O species                                                                                             |                                      |
| * + CO(g) $\rightarrow$ *CO                                                                            | -0.58                                |
| *CO + H <sup>+</sup> + e <sup>-</sup> $\rightarrow$ *CHO + *CO                                         | 0.006                                |
| *CO + H <sup>+</sup> + e <sup>-</sup> $\rightarrow$ *COH + *CO                                         | 2.28                                 |
| *CHO + H <sup>+</sup> + e <sup>-</sup> $\rightarrow$ *OCH <sub>2</sub>                                 | 0.70                                 |
| *OCH <sub>2</sub> + H <sup>+</sup> + e <sup>-</sup> $\rightarrow$ *OCH <sub>3</sub>                    | -1.04                                |
| *OCH <sub>2</sub> + H <sup>+</sup> + e <sup>-</sup> $\rightarrow$ *OHCH <sub>2</sub>                   | 1.54                                 |
| *OCH <sub>3</sub> + H <sup>+</sup> + e <sup>-</sup> $\rightarrow$ *+CH <sub>3</sub> OH                 | 0.53                                 |
| *OCH <sub>3</sub> + H <sup>+</sup> + e <sup>-</sup> $\rightarrow$ *O+CH <sub>4</sub>                   | -1.44                                |
| *O+CH <sub>4</sub> + H <sup>+</sup> + e <sup>-</sup> $\rightarrow$ *OH+CH <sub>4</sub>                 | -2.34                                |
| *OH+CH <sub>4</sub> + H <sup>+</sup> + e <sup>-</sup> $\rightarrow$ *+CH <sub>4</sub>                  | -3.79                                |

Table S5 Calculated the zero-point energy correction, entropy, enthalpy temperature correction, and the total free energy correction of different adsorption species on the B<sub>down</sub> site in the process of C1 path are calculated on the B<sub>4</sub>@g-C<sub>3</sub>N<sub>4</sub>, respectively. \* is the active site.

| Species              | $E_{ZPE}(eV)$ | $-TS(eV)$ | $\int CpdT(eV)$ | $G-Eelec(eV)$ |
|----------------------|---------------|-----------|-----------------|---------------|
| <b>*C species</b>    |               |           |                 |               |
| *CO                  | 0.21          | -0.15     | 0.06            | 0.13          |
| *CHO                 | 0.49          | -0.15     | 0.07            | 0.42          |
| *COH                 | 0.53          | -0.10     | 0.06            | 0.49          |
| *CH <sub>2</sub> O   | 0.74          | -0.20     | 0.09            | 0.63          |
| *CHOH                | 0.83          | -0.12     | 0.07            | 0.72          |
| *CH                  | 0.42          | -0.03     | 0.02            | 0.41          |
| *CH <sub>2</sub> OH  | 1.11          | -0.14     | 0.07            | 1.04          |
| *+CH <sub>3</sub> OH | 1.37          | -0.26     | 0.12            | 1.22          |
| *CH <sub>2</sub>     | 0.72          | -0.04     | 0.03            | 0.71          |
| *CH <sub>3</sub>     | 0.98          | -0.12     | 0.06            | 0.92          |
| *+CH <sub>4</sub>    | 1.21          | -0.20     | 0.08            | 1.09          |
| <b>*O species</b>    |               |           |                 |               |
| *CO                  | 0.21          | -0.15     | 0.06            | 0.13          |
| *CHO                 | 0.49          | -0.15     | 0.07            | 0.42          |
| *COH                 | 0.53          | -0.10     | 0.06            | 0.49          |
| *OCH <sub>2</sub>    | 0.76          | -0.11     | 0.06            | 0.72          |
| *OCH <sub>3</sub>    | 1.12          | -0.18     | 0.09            | 1.03          |
| *+CH <sub>3</sub> OH | 1.38          | -0.27     | 0.12            | 1.22          |
| *O+CH <sub>4</sub>   | 1.30          | -0.26     | 0.12            | 1.16          |
| *OH+CH <sub>4</sub>  | 1.60          | -0.23     | 0.12            | 1.49          |
| *+CH <sub>4</sub>    | 1.20          | -0.20     | 0.09            | 1.09          |
| H <sub>2</sub> (g)   | 0.27          | -0.12     | 0.05            | 0.19          |
| CO(g)                | 0.13          | -0.61     | 0.09            | -0.39         |





Table S6 Free energy change for each possible radical reaction in the electrochemical for the reduction of CO to CH<sub>4</sub> on the B<sub>down</sub> site B<sub>4</sub>@g-C<sub>3</sub>N<sub>4</sub> at U = 0 V for the process of C1 path.

| Primitive response                           | Free energy change ( $\Delta G/eV$ ) |
|----------------------------------------------|--------------------------------------|
| *C species                                   |                                      |
| $* + CO(g) \rightarrow *CO$                  | 0.16                                 |
| $*CO + H^+ + e^- \rightarrow *CHO + *CO$     | -0.51                                |
| $*CO + H^+ + e^- \rightarrow *COH + *CO$     | 0.18                                 |
| $*CHO + H^+ + e^- \rightarrow *CH_2O$        | 0.52                                 |
| $*CHO + H^+ + e^- \rightarrow *CHOH$         | -0.58                                |
| $*CHOH + H^+ + e^- \rightarrow *CH_2OH$      | 0.22                                 |
| $*CHOH + H^+ + e^- \rightarrow *CH$          | 1.66                                 |
| $*CH_2OH + H^+ + e^- \rightarrow *+CH_3OH$   | 0.20                                 |
| $*CH_2OH + H^+ + e^- \rightarrow *CH_2+H_2O$ | -1.24                                |
| $*CH_2+ H^+ + e^- \rightarrow *CH_3$         | 0.08                                 |
| $*CH_3 + H^+ + e^- \rightarrow *CH_4$        | 0.23                                 |
| *O species                                   |                                      |
| $* + CO(g) \rightarrow *CO$                  | 0.16                                 |
| $*CO + H^+ + e^- \rightarrow *CHO + *CO$     | -0.51                                |
| $*CO + H^+ + e^- \rightarrow *COH + *CO$     | 0.18                                 |
| $*CHO + H^+ + e^- \rightarrow *OCH_2$        | 0.48                                 |
| $*OCH_2 + H^+ + e^- \rightarrow *OCH_3$      | -1.62                                |
| $*OCH_3 + H^+ + e^- \rightarrow *+CH_3OH$    | 0.95                                 |
|                                              | -0.28                                |

|                                                                                            |       |
|--------------------------------------------------------------------------------------------|-------|
| $*\text{OCH}_3 + \text{H}^+ + \text{e}^- \rightarrow * \text{O} + \text{CH}_4$             |       |
| $* \text{O} + \text{CH}_4 + \text{H}^+ + \text{e}^- \rightarrow * \text{OH} + \text{CH}_4$ | -0.51 |
| $* \text{OH} + \text{CH}_4 + \text{H}^+ + \text{e}^- \rightarrow * + \text{CH}_4$          | 0.60  |

Table S7 Calculated the zero-point energy correction, entropy, enthalpy temperature correction, and the total free energy correction of different adsorption species in the process of ethanol generation are calculated on the B<sub>4</sub>@g-C<sub>3</sub>N<sub>4</sub>, respectively. \* is the active site.

| Species                              | $E_{ZPE}(eV)$ | $-TS(eV)$ | $\int Cp dT(eV)$ | $G-E_{elec}(eV)$ |
|--------------------------------------|---------------|-----------|------------------|------------------|
| *2CO                                 | 0.40          | -0.27     | 0.12             | 0.43             |
| *COCO                                | 0.44          | -0.22     | 0.11             | 0.33             |
| *CHO+*CO                             | 0.48          | -0.11     | 0.05             | 0.43             |
| *COH+*CO                             | 0.48          | -0.18     | 0.08             | 0.39             |
| *COCHO                               | 0.72          | -0.24     | 0.11             | 0.59             |
| *COHCO                               | 0.76          | -0.24     | 0.12             | 0.64             |
| *CHOCHO                              | 1.00          | -0.31     | 0.14             | 0.83             |
| *CH <sub>2</sub> OCO                 | 1.08          | -0.21     | 0.11             | 0.98             |
| *CHOHCO                              | 1.02          | -0.30     | 0.14             | 0.87             |
| *CHOC                                | 0.64          | -0.17     | 0.09             | 0.56             |
| *CH <sub>2</sub> OCOH                | 1.39          | -0.16     | 0.09             | 1.32             |
| *CHOCHOH                             | 1.33          | -0.26     | 0.13             | 1.20             |
| *COHCHOH                             | 1.36          | -0.30     | 0.15             | 1.21             |
| *CCH <sub>2</sub> O                  | 0.90          | -0.16     | 0.09             | 0.83             |
| *CH <sub>2</sub> OHCOH               | 1.64          | -0.25     | 0.12             | 1.52             |
| *CH <sub>2</sub> OCHOH               | 1.69          | -0.25     | 0.13             | 1.57             |
| *CHCH <sub>2</sub> O                 | 1.29          | -0.10     | 0.07             | 1.25             |
| *CH <sub>2</sub> OCH <sub>2</sub> OH | 2.03          | -0.25     | 0.13             | 1.91             |
| *CH <sub>2</sub> OHCHO               | 2.00          | -0.27     | 0.15             | 1.87             |
| H                                    |               |           |                  |                  |
| *CH <sub>2</sub> CH <sub>2</sub> O   | 1.59          | -0.15     | 0.09             | 1.53             |
| *CHCH <sub>2</sub> OH                | 1.58          | -0.15     | 0.08             | 1.51             |
| *CHCH <sub>2</sub>                   | 1.12          | -0.17     | 0.08             | 1.03             |
| *CH <sub>2</sub> CH <sub>2</sub> OH  | 1.90          | -0.19     | 0.10             | 1.82             |
| *+CH <sub>2</sub> CH <sub>2</sub>    | 1.37          | -0.14     | 0.07             | 1.30             |
| *+CH <sub>3</sub> CH <sub>2</sub> OH | 2.13          | -0.26     | 0.13             | 1.99             |
| H <sub>2</sub> (g)                   | 0.27          | -0.12     | 0.05             | 0.19             |
| CO(g)                                | 0.13          | -0.61     | 0.09             | -0.39            |

Table S8 Free energy change for each possible radical reaction in the electrochemical for the reduction of CO to CH<sub>3</sub>CH<sub>2</sub>OH on B<sub>4</sub>@g-C<sub>3</sub>N<sub>4</sub> at U = 0 V (Bold indicates the optimal primitive reaction)

| Primitive response                                                     | Free energy change ( $\Delta G/eV$ ) |
|------------------------------------------------------------------------|--------------------------------------|
| $* + 2CO(g) \rightarrow *2CO$                                          | -0.36                                |
| $*2CO + H^+ + e^- \rightarrow *CHO + *CO$                              | 0.006                                |
| $*2CO + H^+ + e^- \rightarrow *COH + *CO$                              | 2.28                                 |
| <b><math>*CO + *CO \rightarrow *COCO</math></b>                        | <b>-0.07</b>                         |
| <b><math>*COCO + H^+ + e^- \rightarrow *COCHO</math></b>               | <b>-0.31</b>                         |
| $*COCO + H^+ + e^- \rightarrow *COCO H$                                | 0.60                                 |
| $*COCHO + H^+ + e^- \rightarrow *CHOCHO$                               | 0.60                                 |
| $*COCHO + H^+ + e^- \rightarrow *COCH_2O$                              | -1.41                                |
| $*COCHO + H^+ + e^- \rightarrow *COCHOH$                               | 0.76                                 |
| <b><math>*COCHO + H^+ + e^- \rightarrow *COHCHO</math></b>             | <b>-0.61</b>                         |
| $*COHCHO + H^+ + e^- \rightarrow *CCHO + H_2O$                         | 0.66                                 |
| <b><math>*COHCHO + H^+ + e^- \rightarrow *COHCH_2O</math></b>          | <b>-0.39</b>                         |
| $*COHCHO + H^+ + e^- \rightarrow *CHOHCHO$                             | 0.34                                 |
| $*COHCHO + H^+ + e^- \rightarrow *COHCHOH$                             | 0.66                                 |
| $*COHCH_2O + H^+ + e^- \rightarrow *CCH_2O + H_2O$                     | 1.62                                 |
| $*COHCH_2O + H^+ + e^- \rightarrow *COHCH_2OH$                         | 1.27                                 |
| <b><math>*COHCH_2O + H^+ + e^- \rightarrow *CHOHCH_2O</math></b>       | <b>-0.59</b>                         |
| <b><math>*CHOHCH_2O + H^+ + e^- \rightarrow *CHCH_2O + H_2O</math></b> | <b>-0.30</b>                         |
| $*CHOHCH_2O + H^+ + e^- \rightarrow *CH_2OHCH_2O$                      | 0.06                                 |
| $*CHOHCH_2O + H^+ + e^- \rightarrow *CHOHCH_2OH$                       | 0.92                                 |
| $*CHCH_2O + H^+ + e^- \rightarrow *CH_2CH_2O + H_2O$                   | -0.70                                |
| <b><math>*CHCH_2O + H^+ + e^- \rightarrow *CHCH_2OH + H_2O</math></b>  | <b>0.10</b>                          |
| $*CHCH_2OH + H^+ + e^- \rightarrow *CHCH_2 + H_2O$                     | -0.03                                |
| <b><math>*CHCH_2OH + H^+ + e^- \rightarrow *CH_2CH_2OH</math></b>      | <b>0.02</b>                          |
| $*CHCH_2 + H^+ + e^- \rightarrow * + CH_2CH_2$                         | 0.53                                 |
| <b><math>*CH_2CH_2OH + H^+ + e^- \rightarrow * + CH_3CH_2OH</math></b> | <b>0.19</b>                          |

Figure S1 The phonon spectrum of  $B_4@g-C_3N_4$  catalyst computed using a  $2 \times 2$  supercell within density functional perturbation theory (DFPT) [1] included in the Phonopy program [2].

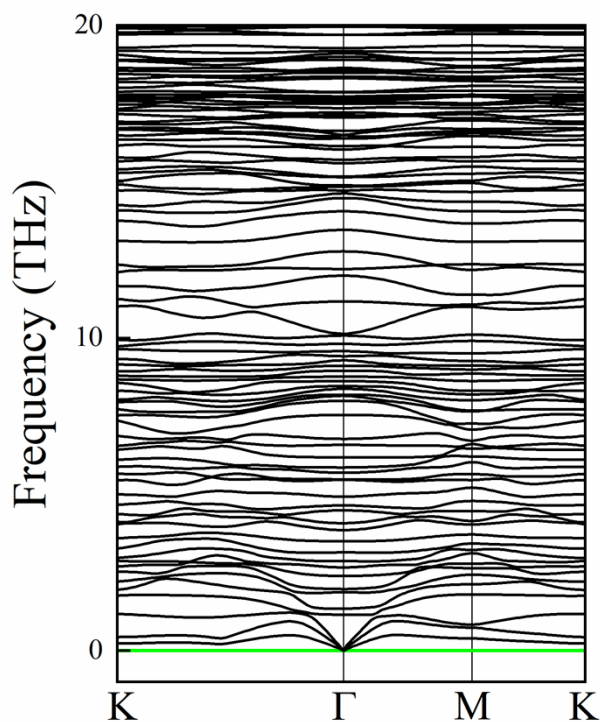

[1] S. Baroni, S. De Gironcoli, A. Dao Corso, P. Giannozzi, Phonons and related crystal properties from density-functional perturbation theory, *Rev. Mod. Phys.*, 2001, **73**, 515.

[2] A. Togo, F. Oba, I. Tanaka, First-principles calculations of the ferroelastic transition between rutile-type and  $CaCl_2$ -type  $SiO_2$  at high pressures, *Phys. Rev. B*, 2008, **78**, 134106.

Figure S2 The unoptimized and optimized structure of CO adsorption on the B-B bridge site.

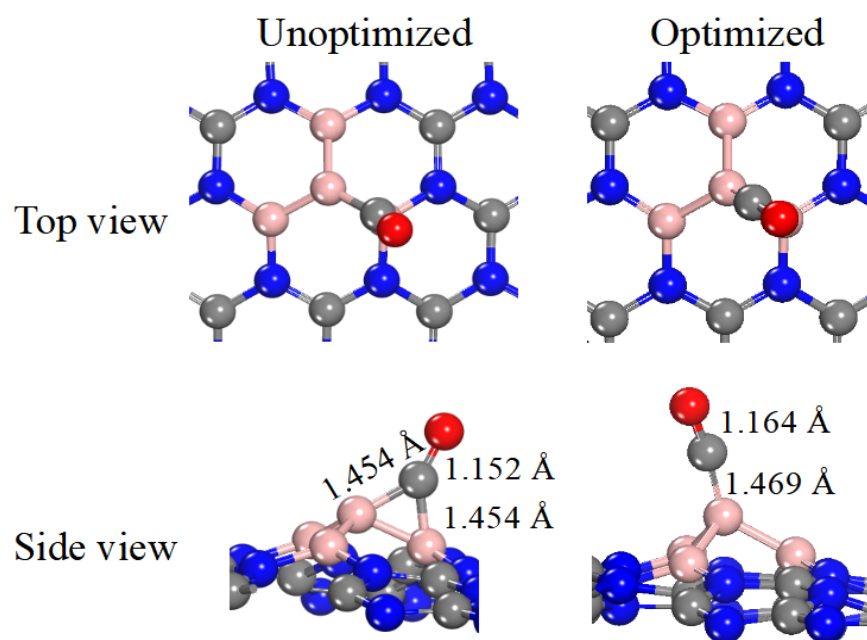

Figure S3 Gibbs free energy change for methane and ethanol products without and with solvation effects.

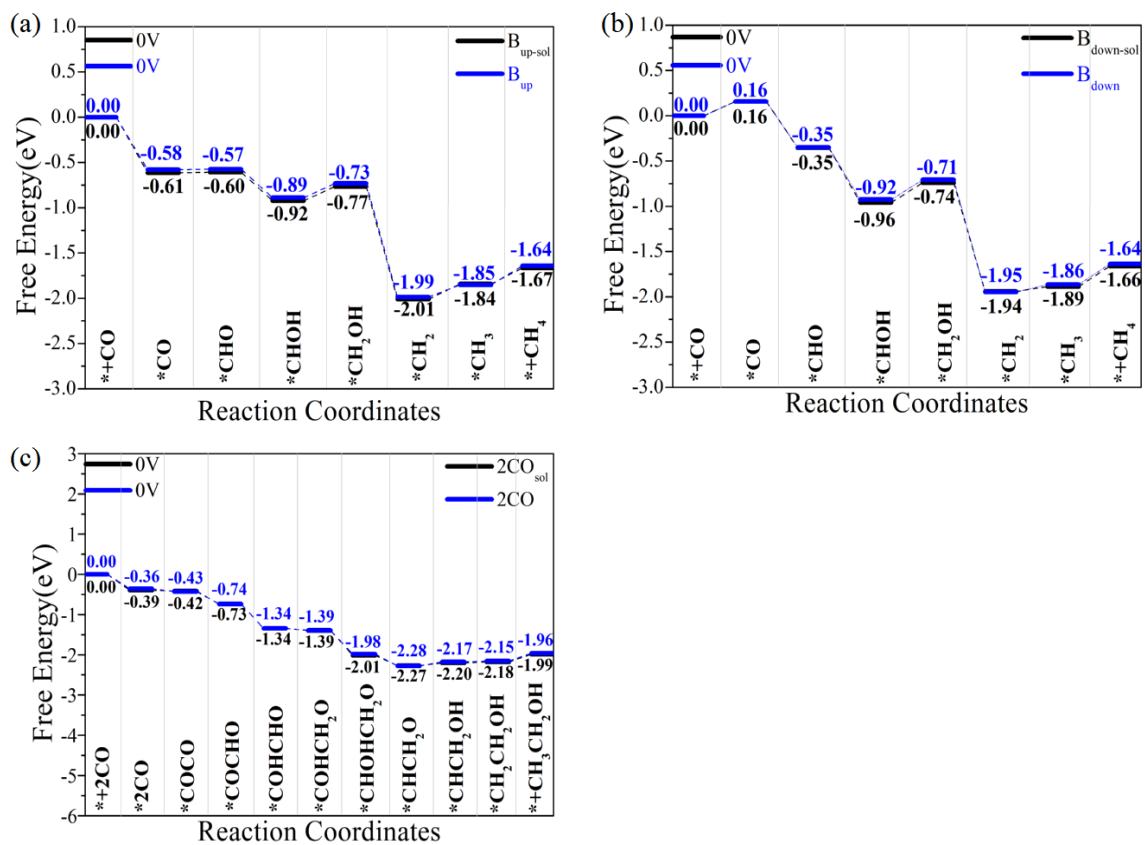

Figure S4 The reaction intermediates in Figure 6.

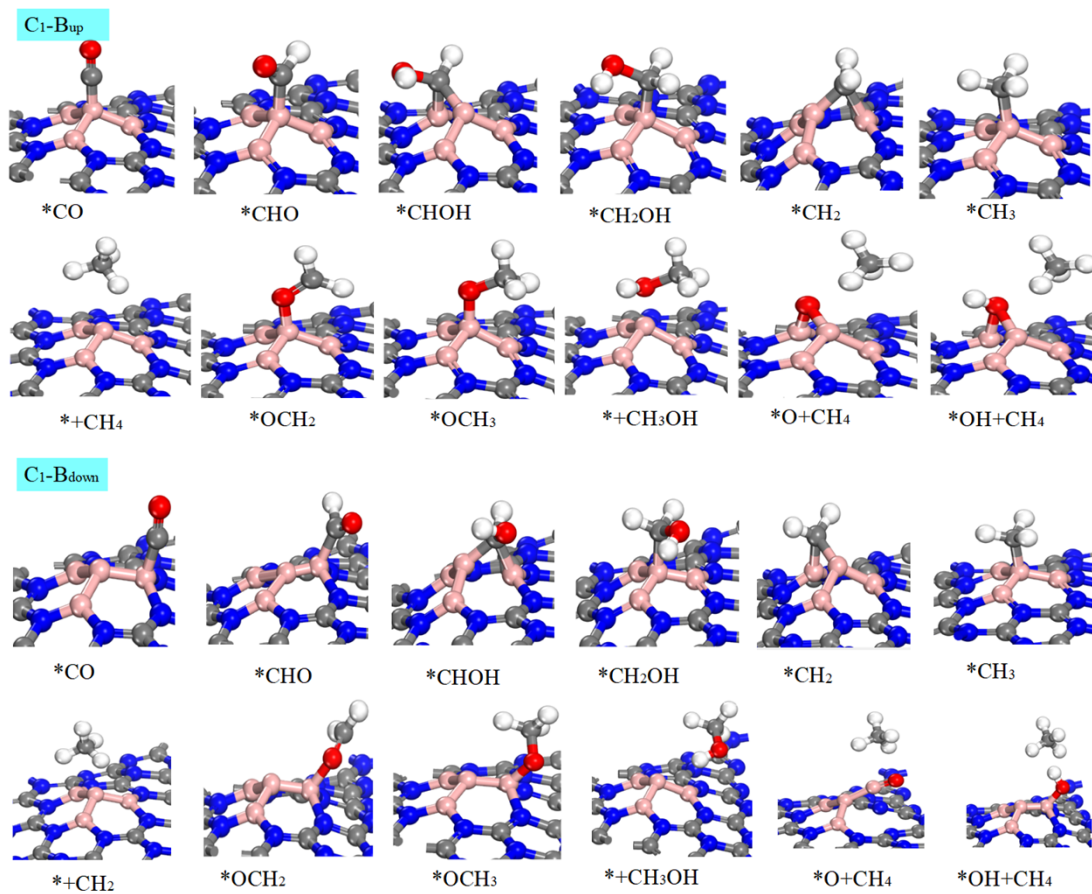



Figure S5 Gibbs free energy change for methane products on (a)  $B_{up}$  and (b)  $B_{down}$  site.

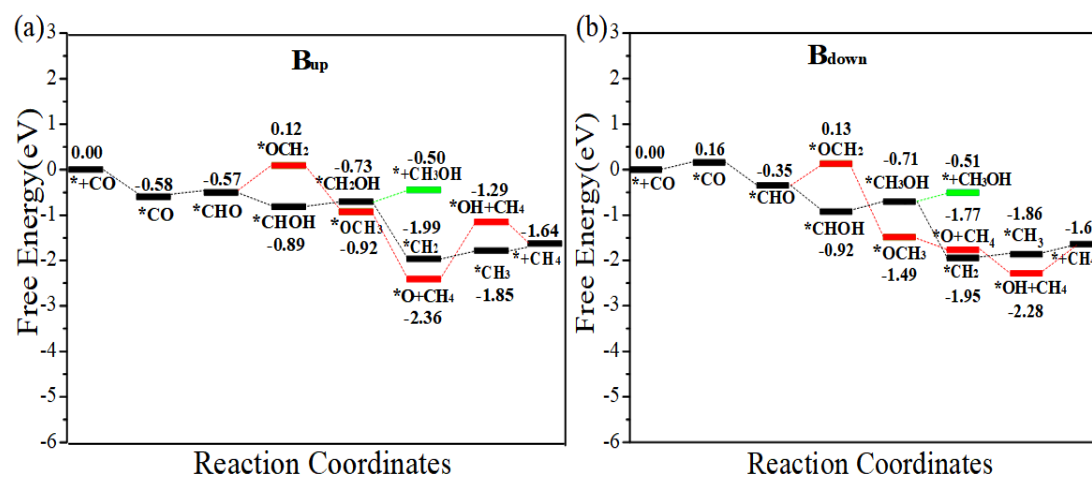

Figure S6  $\Delta G$  and some reaction intermediates for the interaction of  $\text{CH}_2$  with CO on

$\text{B}_4\text{@g-C}_3\text{N}_4$  at 0 V.

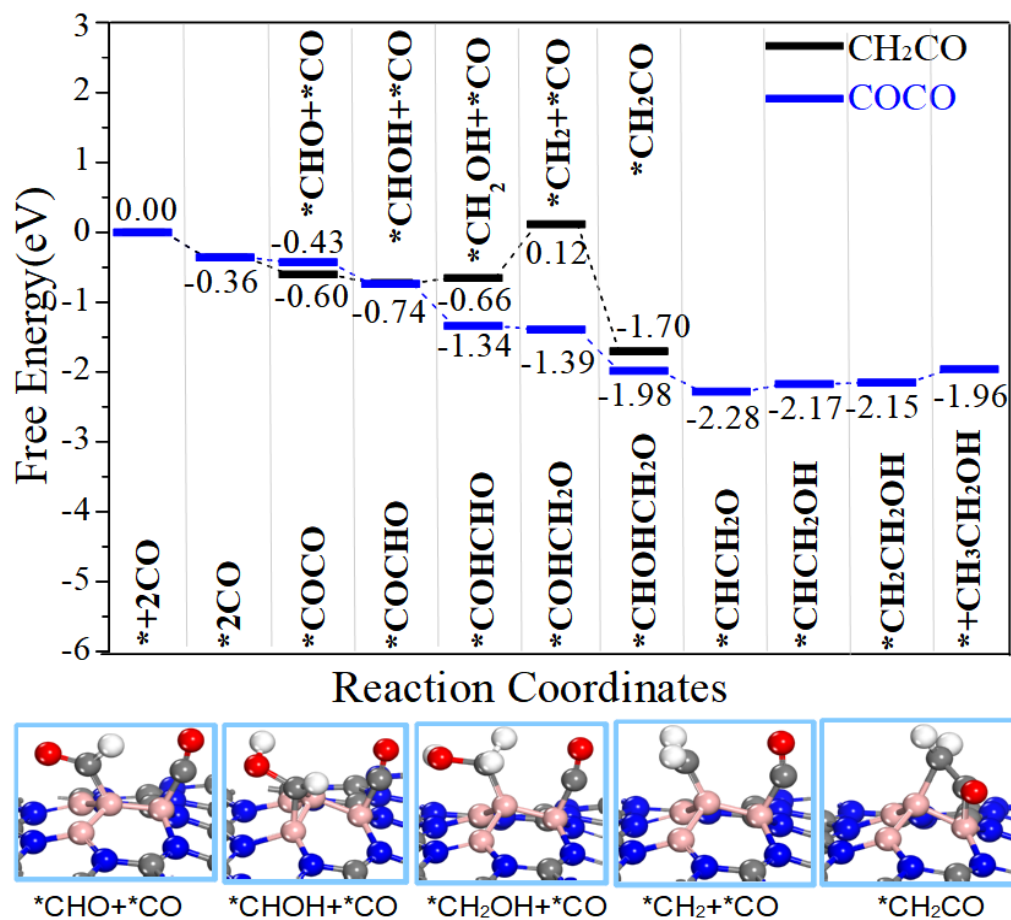

Figure S7 Gibbs free energy change for ethanol products on  $B_4@g-C_3N_4$ .

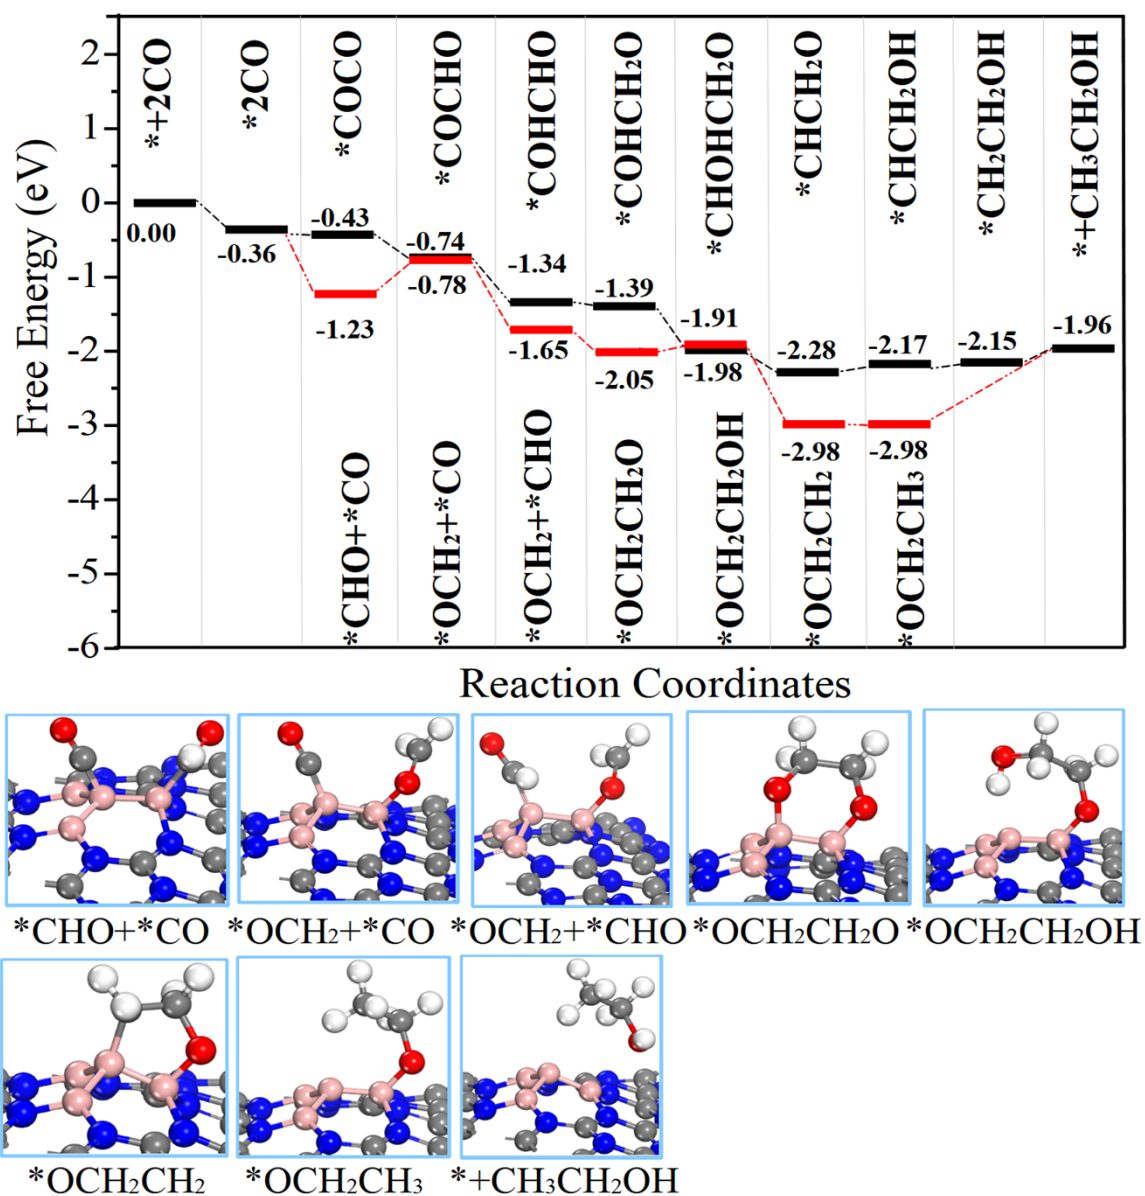

## Structural coordinate information

B<sub>4</sub>@g-C<sub>3</sub>N<sub>4</sub>, Energy without entropy= -501.81 eV

```
1.0000000000000000
 14.2659997900000004    0.0000000000000000    0.0000000000000000
 -7.1329998999999997    12.3547182299999996    0.0000000000000000
  0.0000000000000000    0.0000000000000000    18.0000000000000000
```

```
  B      C      N
   4      24     32
```

Direct

```
0.3933622281039320  0.6077419645376310  0.5466914170674784
0.2186965242425245  0.6084753719504548  0.5495140858926320
0.3938422089198994  0.7827580860433727  0.5491097638613951
0.3357974110794686  0.6658295692087819  0.5837269037352115
0.0501424293615642  0.2758850091721285  0.4879369147566379
0.2231549275542619  0.2767146199641317  0.4764408819236294
0.2212594721643129  0.4408926562020312  0.5152835021398445
0.0514404248877298  0.4373292027824220  0.5036771283083183
0.0577452433688848  0.1185205678515189  0.4729689698176784
0.5646864997944760  0.2816909994808015  0.4815233333396165
0.7247703342780483  0.2785377700320879  0.5266692578645618
0.7242537004806877  0.4488019330865569  0.5219048057066686
0.5640488576208895  0.4401887785278618  0.4953300181837790
0.5655614362910057  0.1250356922914406  0.5027654323986468
0.8801323656206819  0.4419517907044934  0.5258499823608318
0.0559822157071892  0.7773398113775372  0.4805320266515238
0.2229912864642429  0.7798974211506504  0.5167529787646856
0.2244136859712427  0.9519554186895576  0.5075771116997529
0.0602083808808729  0.9420535900593947  0.4812018520475263
0.0534846125011512  0.6155972820874567  0.5007207706157786
0.3870104758544244  0.9520150449246003  0.5117886583983235
0.5607412972101429  0.7801064155928117  0.5164510293755882
0.7234819313969183  0.7755930106265794  0.4804605960088182
0.7225512117919237  0.9479815455267300  0.4771830559514640
0.5620146434327822  0.9477431214906744  0.4979957606418495
0.5620429674149818  0.6148902033199874  0.4927707076539249
0.8806989018328863  0.9402733260644496  0.4695822976902519
0.3852424785198565  0.4375283705160129  0.4910171365326974
0.0013307790105657  0.1712192405210402  0.4787258815842250
0.3314030141103785  0.3377386132056444  0.4687176827641437
0.1639865592855827  0.4946379632310069  0.5234043119264271
0.3329943296936122  0.4951224309630078  0.5178706617729247
0.1668672480966151  0.1733896189289794  0.4616344850920200
0.0014597184040710  0.3360919194487906  0.4839185051047181
```

|                    |                    |                    |
|--------------------|--------------------|--------------------|
| 0.9996057331939667 | 0.0001134552420581 | 0.4725549018493567 |
| 0.1669409859109905 | 0.3331820972551967 | 0.5036770456059116 |
| 0.5167140804326706 | 0.1743115951356202 | 0.4711610398200747 |
| 0.8314946833645749 | 0.3342197392533350 | 0.5361612438457115 |
| 0.6634496303639210 | 0.4962391811973532 | 0.5243844742397954 |
| 0.8313127579331194 | 0.5015804923341136 | 0.5306979647932337 |
| 0.6641749585414303 | 0.1703333679253376 | 0.5331792572122396 |
| 0.5151182747050456 | 0.3387679184635246 | 0.4691023433164929 |
| 0.5027372408288571 | 0.0048477256608948 | 0.5045364643150521 |
| 0.6717901362912571 | 0.3363682557783534 | 0.5074363141107625 |
| 0.0066046502711004 | 0.6679517385484104 | 0.4760654403571181 |
| 0.3339533651810882 | 0.8367738091443329 | 0.5223195513595158 |
| 0.1658750843136332 | 0.9991657230754001 | 0.5024538776808853 |
| 0.3332244831588724 | 0.0040985990402547 | 0.5131611251729140 |
| 0.1648978126849840 | 0.6686411797485974 | 0.5231012698005415 |
| 0.0093080697291512 | 0.8342273058757144 | 0.4664099957966386 |
| 0.9963016867925987 | 0.4991423439474758 | 0.5105919733089834 |
| 0.1695370465696371 | 0.8336077891125839 | 0.5034973237870943 |
| 0.5067335855428041 | 0.6683805194231098 | 0.5196266132393035 |
| 0.8278294018112859 | 0.8307214691398315 | 0.4690001848064043 |
| 0.6610774621849913 | 0.9949003651382782 | 0.4717446758820429 |
| 0.8257822670934587 | 0.9946647219297517 | 0.4611938023579896 |
| 0.6625619850844586 | 0.6678196655815540 | 0.4707971064253016 |
| 0.5072955871858511 | 0.8376050004328732 | 0.5227474332146755 |
| 0.5018956574289390 | 0.4982421700554127 | 0.4927120616216101 |
| 0.6691645520535516 | 0.8347413820000185 | 0.5047860884467426 |

**Structural coordinate information of C1 product is generated at the B<sub>up</sub> site on catalyst B<sub>4</sub>@g-C<sub>3</sub>N<sub>4</sub>**

\*CO , Energy without entropy=-517.73 eV

1.0000000000000000

|                     |                     |                     |
|---------------------|---------------------|---------------------|
| 14.2659997940000007 | 0.0000000000000000  | 0.0000000000000000  |
| -7.1329998970000004 | 12.3547182319999997 | 0.0000000000000000  |
| 0.0000000000000000  | 0.0000000000000000  | 18.0000000000000000 |

| B | C  | N  | O |
|---|----|----|---|
| 4 | 25 | 32 | 1 |

Direct

|                    |                    |                    |
|--------------------|--------------------|--------------------|
| 0.3932206221738295 | 0.6081156600565099 | 0.5438468329055992 |
| 0.2191982930584099 | 0.6087215039752731 | 0.5463393728018600 |
| 0.3933912710427517 | 0.7820493582559256 | 0.5457420756797808 |
| 0.3359406013570813 | 0.6656065916153617 | 0.5928741528841346 |
| 0.0506724447874159 | 0.2760594568415368 | 0.4881141336755383 |
| 0.2226623671874214 | 0.2770481184103810 | 0.4765215918522408 |
| 0.2210460129708065 | 0.4404737607700175 | 0.5152652722717972 |
| 0.0515741687381752 | 0.4378290673472023 | 0.5032365835501115 |

|                    |                    |                    |
|--------------------|--------------------|--------------------|
| 0.0578877266604219 | 0.1186050575514283 | 0.4732813629059597 |
| 0.5647374464983576 | 0.2817627336712590 | 0.4813658615224128 |
| 0.7249038440366056 | 0.2784896737056744 | 0.5266330930706719 |
| 0.7244525101694791 | 0.4490141122404477 | 0.5218311641661681 |
| 0.5641031057373626 | 0.4402267244998868 | 0.4952406591034998 |
| 0.5655869782709110 | 0.1250888434715956 | 0.5025381703500692 |
| 0.8802735522844407 | 0.4420177968935058 | 0.5260895501680743 |
| 0.0564320272003779 | 0.7776945981984823 | 0.4806796336823234 |
| 0.2225488267161684 | 0.7800627669477723 | 0.5169561517050242 |
| 0.2237569489570066 | 0.9512095945149291 | 0.5078965905314988 |
| 0.0602118687594592 | 0.9420117298660859 | 0.4811482683806466 |
| 0.0537442903310478 | 0.6152465045829074 | 0.5002190262865035 |
| 0.3871883347080555 | 0.9516649886709805 | 0.5111309552432596 |
| 0.5612415061773540 | 0.7803540258056891 | 0.5161663473773268 |
| 0.7234243900346207 | 0.7761317795111856 | 0.4803635208273072 |
| 0.7224760767857655 | 0.9474573524248645 | 0.4771274986763370 |
| 0.5613963674597968 | 0.9474320198809519 | 0.4970254615031839 |
| 0.5616022035021502 | 0.6147203184848288 | 0.4918087354723173 |
| 0.8808632434743098 | 0.9404200741603317 | 0.4698021173319337 |
| 0.3855117941440348 | 0.4382273295120077 | 0.4903203616223158 |
| 0.3370326140226585 | 0.6666723648468940 | 0.6744046956560110 |
| 0.0014542887061961 | 0.1710624563531203 | 0.4793178532263402 |
| 0.3310841503115016 | 0.3386563063656490 | 0.4684102930787045 |
| 0.1651305048084079 | 0.4957964644458167 | 0.5229202703602385 |
| 0.3328600813077113 | 0.4964058943671376 | 0.5174850871192160 |
| 0.1668650840678947 | 0.1734318236045343 | 0.4619133902143857 |
| 0.0023171390861121 | 0.3366088688089380 | 0.4839500008924080 |
| 0.9996905514939943 | 0.0001381698013723 | 0.4725263892688165 |
| 0.1666953493616748 | 0.3326750212020267 | 0.5037047197085179 |
| 0.5166028508004984 | 0.1743507444024366 | 0.4712010390992352 |
| 0.8315321205345021 | 0.3341456997883044 | 0.5365242431818270 |
| 0.6634844002227909 | 0.4963627769625779 | 0.5243374338851258 |
| 0.8314368052677142 | 0.5017232028687940 | 0.5309560740403464 |
| 0.6640974411225296 | 0.1701989697711712 | 0.5331450743140149 |
| 0.5149399743503844 | 0.3386798687316007 | 0.4691998310611826 |
| 0.5025873457414802 | 0.0045572017977836 | 0.5039487690562904 |
| 0.6721355389663846 | 0.3365325042566421 | 0.5068215317081143 |
| 0.0077277263266722 | 0.6683193821363985 | 0.4756674222628970 |
| 0.3337265727683402 | 0.8353633059842007 | 0.5215302776964762 |
| 0.1658249846995427 | 0.9991379889505788 | 0.5023184954884429 |
| 0.3329279662293718 | 0.0029716387068296 | 0.5125187442423687 |
| 0.1661709167495373 | 0.6686567088865708 | 0.5225883225769673 |
| 0.0095800990113111 | 0.8345029436816959 | 0.4659588241490317 |
| 0.9963457828763633 | 0.4991860401103649 | 0.5107091953985687 |

|                    |                    |                    |
|--------------------|--------------------|--------------------|
| 0.1685239001349137 | 0.8337259138707491 | 0.5053788360623714 |
| 0.5055397062965834 | 0.6684206251423065 | 0.5190913287881568 |
| 0.8280933681153173 | 0.8309837438897648 | 0.4695252449364706 |
| 0.6604812536576324 | 0.9940551813946954 | 0.4715401920046937 |
| 0.8261014710645831 | 0.9948812266781528 | 0.4617853882309115 |
| 0.6620127322523764 | 0.6681538261442893 | 0.4705871219731404 |
| 0.5059753016802224 | 0.8362781241414946 | 0.5220960762081712 |
| 0.5018798510839070 | 0.4984419664135381 | 0.4922608790924554 |
| 0.6692416913552182 | 0.8347823765943647 | 0.5038041522542862 |
| 0.3377915623020429 | 0.6681590990321582 | 0.7387481982159336 |

\*CHO , Energy without entropy=-521.38 eV

1.0000000000000000

14.2659997940000007 0.0000000000000000 0.0000000000000000

-7.1329998970000004 12.3547182319999997 0.0000000000000000

0.0000000000000000 0.0000000000000000 18.0000000000000000

B C N O H

4 25 32 1 1

Direct

|                    |                    |                    |
|--------------------|--------------------|--------------------|
| 0.3936361017810796 | 0.6097560624475993 | 0.5437801558282318 |
| 0.2182642415579872 | 0.6084728571036455 | 0.5489116961120760 |
| 0.3934340927908627 | 0.7801970775119023 | 0.5463619758315537 |
| 0.3354474422972765 | 0.6648517617713274 | 0.5923192249091264 |
| 0.0516502989365000 | 0.2764559548423462 | 0.4884784989967715 |
| 0.2227831093989106 | 0.2777239357848167 | 0.4764479816433227 |
| 0.2214999954220558 | 0.4421146022770429 | 0.5125557111746616 |
| 0.0512347566784407 | 0.4375247795393349 | 0.5031415310066744 |
| 0.0584196241902937 | 0.1185271792529242 | 0.4750443829138865 |
| 0.5638959027210015 | 0.2811856187801587 | 0.4808497753260461 |
| 0.7237813860494646 | 0.2778477870305366 | 0.5261451534598142 |
| 0.7233643590475041 | 0.4481466746902961 | 0.5215517532486155 |
| 0.5637542652851349 | 0.4399474648124274 | 0.4940490330305837 |
| 0.5648157956972888 | 0.1244341327718661 | 0.5018441679335097 |
| 0.8790699990668569 | 0.4411750595524876 | 0.5248322659251055 |
| 0.0565829026443892 | 0.7776992132665866 | 0.4808211455331929 |
| 0.2222453474768768 | 0.7792402887881635 | 0.5172619352915426 |
| 0.2237845359126391 | 0.9501749441658927 | 0.5071130621766293 |
| 0.0604548966278858 | 0.9420620379744562 | 0.4817988701791704 |
| 0.0533799529960624 | 0.6152591031061647 | 0.5000594823977521 |
| 0.3867155777606376 | 0.9500711710978754 | 0.5104313976627148 |
| 0.5609336320339986 | 0.7801115516407960 | 0.5130373403145388 |
| 0.7239654489872943 | 0.7762584373112530 | 0.4792667123408657 |
| 0.7228368222655880 | 0.9475421026691440 | 0.4759245444815791 |
| 0.5617867300066004 | 0.9472683099513927 | 0.4956756347769506 |
| 0.5622938217881661 | 0.6151502095213954 | 0.4901163392950906 |

|                    |                    |                    |
|--------------------|--------------------|--------------------|
| 0.8815600167935049 | 0.9408989204903925 | 0.4707541214072056 |
| 0.3856181250380639 | 0.4391335820613727 | 0.4889028319804420 |
| 0.3420097471477787 | 0.6694441810822825 | 0.6818016868047716 |
| 0.0021915575427307 | 0.1713767054665320 | 0.4821267293680600 |
| 0.3319234856769055 | 0.3388139673025516 | 0.4690118507931465 |
| 0.1639961258916342 | 0.4964704172541291 | 0.5218813339792947 |
| 0.3339653543394522 | 0.4982102139419284 | 0.5145275133904351 |
| 0.1673937340327144 | 0.1736373956662659 | 0.4639761991376141 |
| 0.0014032274156619 | 0.3363734083780947 | 0.4848728234644785 |
| 0.0003889639125081 | 0.0004910166553412 | 0.4740185004763990 |
| 0.1675487547893788 | 0.3354712208520372 | 0.4989084293512035 |
| 0.5160285963557646 | 0.1739130124466607 | 0.4704744361764634 |
| 0.8306835163576275 | 0.3336651058052700 | 0.5350499746554992 |
| 0.6627454672721456 | 0.4957831734305411 | 0.5238639328913638 |
| 0.8306288432860457 | 0.5009857167455246 | 0.5297531217226356 |
| 0.6634270450751829 | 0.1696880593995258 | 0.5323778951949156 |
| 0.5150275002469047 | 0.3388240587110939 | 0.4675859402984163 |
| 0.5025328782090104 | 0.0041354436492653 | 0.5028726436484531 |
| 0.6707502927577604 | 0.3357658110861299 | 0.5074393660800017 |
| 0.0070760156457449 | 0.6676861854804328 | 0.4753541516178937 |
| 0.3341001394914442 | 0.8347895757368184 | 0.5209722198820290 |
| 0.1666419095116078 | 0.9986235678726419 | 0.5018856483882592 |
| 0.3334190962232355 | 0.0020532422953336 | 0.5112116087587708 |
| 0.1644872595067435 | 0.6674112925997444 | 0.5230365504342959 |
| 0.0095925277795580 | 0.8343794133904280 | 0.4668723884081257 |
| 0.9955972204944887 | 0.4987142646153894 | 0.5095921319640299 |
| 0.1687942713243852 | 0.8328941357235116 | 0.5045987852352466 |
| 0.5057917702898590 | 0.6681386166947896 | 0.5166242507932479 |
| 0.8288362522498961 | 0.8314983123435352 | 0.4707563919411182 |
| 0.6609223081188155 | 0.9949942149301548 | 0.4708059544482888 |
| 0.8267554652101302 | 0.9954680436996401 | 0.4624566370932430 |
| 0.6630784470792918 | 0.6678599807694799 | 0.4697795054599926 |
| 0.5058388303831864 | 0.8364704067489542 | 0.5198917473666814 |
| 0.5021485964135860 | 0.4988391913280050 | 0.4903883666477574 |
| 0.6677135960623961 | 0.8340679037750681 | 0.4991883919083716 |
| 0.2663674087617256 | 0.6448398210145128 | 0.7248015952884260 |
| 0.4247247128923318 | 0.6988522258947932 | 0.7067544957534695 |

\*CHOH , Energy without entropy=-491.61 eV

1.0000000000000000

|                     |                     |                     |
|---------------------|---------------------|---------------------|
| 14.2659997940000007 | 0.0000000000000000  | 0.0000000000000000  |
| -7.1329998970000004 | 12.3547182319999997 | 0.0000000000000000  |
| 0.0000000000000000  | 0.0000000000000000  | 18.0000000000000000 |

|   |    |    |   |   |
|---|----|----|---|---|
| B | C  | N  | O | H |
| 4 | 25 | 32 | 1 | 2 |



Direct

|                     |                     |                    |
|---------------------|---------------------|--------------------|
| 0.3922536165576060  | 0.6021815144220443  | 0.5473976553307502 |
| 0.2170435901554061  | 0.6019172260298667  | 0.5519525569431597 |
| 0.3953196352530474  | 0.7826299931829238  | 0.5546380119008776 |
| 0.3303715333976308  | 0.6494938293564699  | 0.5961807281855479 |
| 0.0473042372468425  | 0.2679213776051764  | 0.4968311329880430 |
| 0.2200161902211497  | 0.2701416178645914  | 0.4785879478933357 |
| 0.2192827506644524  | 0.4359534719990986  | 0.5128575238440494 |
| 0.0478835042810658  | 0.4300986248366799  | 0.5089545187979069 |
| 0.0551524751334031  | 0.1110027616470633  | 0.4802017591658591 |
| 0.5611173101390503  | 0.2737044031991233  | 0.4804202721519333 |
| 0.7200604143542404  | 0.2702586919015101  | 0.5277190238842107 |
| 0.7195424799157812  | 0.4404156136894009  | 0.5230739464991665 |
| 0.5604593077343898  | 0.4323750043589807  | 0.4937731156214961 |
| 0.5618935737390435  | 0.1167891226003637  | 0.5021326923050740 |
| 0.8753697585910312  | 0.4337935639368581  | 0.5294279655784835 |
| 0.0523970204609160  | 0.7696395602163453  | 0.4877267969585707 |
| 0.2208864257615489  | 0.7725734175994919  | 0.5190782637649146 |
| 0.2220422245194304  | 0.9440483579346038  | 0.5099963805186831 |
| 0.0573295250697994  | 0.9343893343698967  | 0.4867917645167322 |
| 0.0501215047498632  | 0.6078302986624039  | 0.5067104341373226 |
| 0.3842572776234497  | 0.9431329599578137  | 0.5111173866070844 |
| 0.5590809400028030  | 0.7734354782643218  | 0.5163531374198947 |
| 0.7212474117272240  | 0.7685712603960498  | 0.4797144122160477 |
| 0.7207980459477946  | 0.9408553191531163  | 0.4772511424538019 |
| 0.5596124509665449  | 0.9397572624326548  | 0.4970106551657081 |
| 0.5593959639503141  | 0.6080201804315043  | 0.4913824188171735 |
| 0.8787307630909609  | 0.9332065728379187  | 0.4715938322316551 |
| 0.3828109150626500  | 0.4323276040458054  | 0.4890947593735917 |
| 0.3775360187053370  | 0.7571052847888528  | 0.6410648599238500 |
| -0.0013379295895705 | 0.1626503060244657  | 0.4915765928724357 |
| 0.3283222685483682  | 0.3311300940987679  | 0.4701401006723292 |
| 0.1630876389551174  | 0.4903746010268299  | 0.5219269307664172 |
| 0.3309546522648925  | 0.4922335101726302  | 0.5133330947534521 |
| 0.1636169018079796  | 0.1662658599955970  | 0.4658871518610873 |
| -0.0027400355072151 | 0.3269411018872412  | 0.4953588871408562 |
| -0.0027994347156158 | -0.0073132988139150 | 0.4778718614377185 |
| 0.1653341885383277  | 0.3282099343589662  | 0.5036400515315365 |
| 0.5134158918991140  | 0.1662885015940623  | 0.4700822688089677 |
| 0.8263907007030827  | 0.3260299628681957  | 0.5386125867704222 |
| 0.6588120649572279  | 0.4880185790401501  | 0.5243860082565449 |
| 0.8262852051125525  | 0.4931567824462070  | 0.5337064511053710 |
| 0.6599089493478696  | 0.1619192890728394  | 0.5333674939499092 |
| 0.5123529432610420  | 0.3313971829552139  | 0.4666160697270434 |

|                    |                     |                    |
|--------------------|---------------------|--------------------|
| 0.4997213340215837 | -0.0036377051971425 | 0.5033722485485133 |
| 0.6674092223178273 | 0.3281603822684475  | 0.5078904685087051 |
| 0.0026668160187740 | 0.6604464031506007  | 0.4841159738015901 |
| 0.3308421020303302 | 0.8271820169252396  | 0.5186121068480313 |
| 0.1643122839467976 | 0.9921268955652199  | 0.5055244567191084 |
| 0.3311344449013051 | -0.0043210154259211 | 0.5147259959218052 |
| 0.1624122125064430 | 0.6613171690658356  | 0.5282462994698592 |
| 0.0050441599489388 | 0.8262895220674744  | 0.4748097140615796 |
| 0.9925828045553670 | 0.4913676134471182  | 0.5157750679452381 |
| 0.1670058444222718 | 0.8263263209606130  | 0.5068913805446821 |
| 0.5050753719264263 | 0.6617685891548315  | 0.5205539536717064 |
| 0.8255855763296763 | 0.8237190339764763  | 0.4683983851779708 |
| 0.6589584834195329 | 0.9873098155959344  | 0.4711113883689334 |
| 0.8245015393590515 | 0.9882162228522746  | 0.4621226367558032 |
| 0.6596312588021523 | 0.6611209259668530  | 0.4688880889849127 |
| 0.5052108409008589 | 0.8293709201352183  | 0.5208789653658905 |
| 0.4989046347402124 | 0.4915250948838494  | 0.4904754098918879 |
| 0.6680764122510232 | 0.8282296111363335  | 0.5055952870895243 |
| 0.3046975586401973 | 0.7861057275476501  | 0.6748595380929056 |
| 0.4524364892705475 | 0.7861147873036377  | 0.6732169281267687 |
| 0.2413397800847151 | 0.7190994081712803  | 0.6905449682555660 |

\*CH<sub>2</sub>OH , Energy without entropy=-528.95 eV

1.0000000000000000

|                     |                     |                     |
|---------------------|---------------------|---------------------|
| 14.2659997940000007 | 0.0000000000000000  | 0.0000000000000000  |
| -7.1329998970000004 | 12.3547182319999997 | 0.0000000000000000  |
| 0.0000000000000000  | 0.0000000000000000  | 18.0000000000000000 |

| B | C  | N  | O | H |
|---|----|----|---|---|
| 4 | 25 | 32 | 1 | 3 |

Direct

|                    |                    |                    |
|--------------------|--------------------|--------------------|
| 0.3906562407128366 | 0.6011612163023784 | 0.5464500319924143 |
| 0.2183478596762169 | 0.6010513566654975 | 0.5550681798750774 |
| 0.3916968416393035 | 0.7742623687324469 | 0.5519481005222181 |
| 0.3367396210647016 | 0.6584255312072944 | 0.5978115986264704 |
| 0.0485131750215496 | 0.2676087612678151 | 0.4960944994448334 |
| 0.2193084768124795 | 0.2691177617795784 | 0.4797216476808338 |
| 0.2189790031726444 | 0.4335607144061692 | 0.5175039326149541 |
| 0.0490307520161354 | 0.4294378268042032 | 0.5101756696913740 |
| 0.0547720182060705 | 0.1098781460980671 | 0.4798249749834210 |
| 0.5618467334697255 | 0.2737527351978331 | 0.4804604622886552 |
| 0.7206986343243492 | 0.2703411009674879 | 0.5283258975779173 |
| 0.7207187994865550 | 0.4406475906017705 | 0.5223191306217906 |
| 0.5611310906656729 | 0.4322682241711626 | 0.4937499879121178 |
| 0.5619206751480829 | 0.1169255149660961 | 0.5030816073984440 |
| 0.8763794548555418 | 0.4335750460812381 | 0.5289655879718406 |

|                    |                    |                    |
|--------------------|--------------------|--------------------|
| 0.0538701932161329 | 0.7693336697080796 | 0.4866848123800309 |
| 0.2201095225480752 | 0.7719055404576741 | 0.5235922602803617 |
| 0.2208375140766242 | 0.9425149452512744 | 0.5110245104875960 |
| 0.0568129152162054 | 0.9332634452478078 | 0.4860192047913500 |
| 0.0520381428930131 | 0.6074667407842307 | 0.5062626210047509 |
| 0.3838787299334032 | 0.9429349272224732 | 0.5137246903628451 |
| 0.5568280060217926 | 0.7720266956870742 | 0.5132997232650445 |
| 0.7198938435678410 | 0.7682210296611959 | 0.4794946783774795 |
| 0.7193004184515899 | 0.9395834876446044 | 0.4773793956583776 |
| 0.5585560266879207 | 0.9397731533097425 | 0.4976083081560637 |
| 0.5582442686384655 | 0.6070045016245473 | 0.4899968411038830 |
| 0.8779493249493574 | 0.9326649288975615 | 0.4731523743426017 |
| 0.3823273613936463 | 0.4305830006750118 | 0.4906454856807923 |
| 0.3454104515909134 | 0.6559614500115662 | 0.6890878989356105 |
| 0.9987319130536927 | 0.1623890605531272 | 0.4897717606079803 |
| 0.3281892692038582 | 0.3302353501111723 | 0.4705654262839222 |
| 0.1622269526253902 | 0.4884920857245473 | 0.5278908869812047 |
| 0.3313147037210435 | 0.4893862747734342 | 0.5179264770489799 |
| 0.1632718842014921 | 0.1651246750398980 | 0.4666397440489040 |
| 0.9985323713266299 | 0.3276410097320298 | 0.4934046360574447 |
| 0.9965104068824440 | 0.9916679066397404 | 0.4778329104785818 |
| 0.1647754669510790 | 0.3266218884714233 | 0.5046871935447034 |
| 0.5137905817424698 | 0.1663011170757579 | 0.4705706303192358 |
| 0.8271888450410113 | 0.3260137200653598 | 0.5394105009183467 |
| 0.6598195060297296 | 0.4880415909556860 | 0.5239808677813694 |
| 0.8276889275533856 | 0.4933623174399112 | 0.5323557448126164 |
| 0.6598037057327807 | 0.1622511686504562 | 0.5346721886458394 |
| 0.5127910153570280 | 0.3312601012217377 | 0.4669582756427445 |
| 0.4995234076369658 | 0.9967790650840496 | 0.5048859173555951 |
| 0.6685558895391481 | 0.3283960288093637 | 0.5073556931049522 |
| 0.0054939708431053 | 0.6596514075618386 | 0.4813340976908691 |
| 0.3319100651663184 | 0.8283628530153785 | 0.5266705207837534 |
| 0.1634371747801412 | 0.9905847766489382 | 0.5048681627253712 |
| 0.3306508133908710 | 0.9950951939347900 | 0.5135062931274524 |
| 0.1633539007848895 | 0.6599728254165884 | 0.5296108163870975 |
| 0.0062532488558649 | 0.8254191904386978 | 0.4722062879189908 |
| 0.9936737702648178 | 0.4909376770803577 | 0.5157626928544684 |
| 0.1660159329881790 | 0.8251611859728548 | 0.5110978074406035 |
| 0.5015796986008467 | 0.6599219337555520 | 0.5164988079720304 |
| 0.8249783613573582 | 0.8233154375533497 | 0.4719995011946786 |
| 0.6576270912699999 | 0.9876904089417982 | 0.4726533580959074 |
| 0.8234810002351752 | 0.9877754058408319 | 0.4648521436697475 |
| 0.6591047922740224 | 0.6597393973224978 | 0.4698402388288752 |
| 0.5025941399234563 | 0.8291032552698966 | 0.5218534396811503 |

|                    |                    |                    |
|--------------------|--------------------|--------------------|
| 0.4988399584739749 | 0.4907206508302203 | 0.4905448484996207 |
| 0.6634876951852772 | 0.8257813144978468 | 0.4988315238185398 |
| 0.2826467593749409 | 0.6947248548871207 | 0.7283206233669810 |
| 0.4291956395685358 | 0.7092483090663264 | 0.7079505653105779 |
| 0.2073530340149818 | 0.6465700588060866 | 0.7148873752271829 |
| 0.3214320095922421 | 0.5733592833794746 | 0.7088376377445342 |

\*CH<sub>2</sub> , Energy without entropy=-519.06 eV

1.0000000000000000

|                     |                     |                     |
|---------------------|---------------------|---------------------|
| 14.2659997940000007 | 0.0000000000000000  | 0.0000000000000000  |
| -7.1329998970000004 | 12.3547182319999997 | 0.0000000000000000  |
| 0.0000000000000000  | 0.0000000000000000  | 18.0000000000000000 |

|   |    |    |   |
|---|----|----|---|
| B | C  | N  | H |
| 4 | 25 | 32 | 2 |

Direct

|                    |                    |                    |
|--------------------|--------------------|--------------------|
| 0.3953127767642717 | 0.5983282713253675 | 0.5628712046430477 |
| 0.2151708396716673 | 0.6039540432800971 | 0.5555661523977341 |
| 0.3901931728836273 | 0.7779925802296407 | 0.5522992097375451 |
| 0.3271496940899153 | 0.6690490441561678 | 0.6004915571833376 |
| 0.0462826524146031 | 0.2693116333140661 | 0.4982958680806253 |
| 0.2188457777618301 | 0.2710982636131537 | 0.4848619918278322 |
| 0.2175967029962450 | 0.4351335648374151 | 0.5249100000300247 |
| 0.0477658036047687 | 0.4312487614841454 | 0.5120209903492710 |
| 0.0538923485792344 | 0.1122245258959721 | 0.4814869782927300 |
| 0.5596972404887631 | 0.2756549765139474 | 0.4835719364350101 |
| 0.7199875589551525 | 0.2719097913610645 | 0.5277878611790610 |
| 0.7193736172759494 | 0.4421359254400773 | 0.5249399951224990 |
| 0.5592481653579552 | 0.4341969341539590 | 0.4990071175397975 |
| 0.5608959576233036 | 0.1186578021668237 | 0.5030237164528589 |
| 0.8753621558273766 | 0.4353630698081951 | 0.5295834719716582 |
| 0.0520452246947694 | 0.7704378729404948 | 0.4828530376214045 |
| 0.2204078275385676 | 0.7725258749511534 | 0.5117241757327329 |
| 0.2211842778683135 | 0.9447349924864632 | 0.5075017536751204 |
| 0.0559924790274743 | 0.9350138074834111 | 0.4854928118412062 |
| 0.0497819535878202 | 0.6085788615555153 | 0.5036636066364031 |
| 0.3834118485444704 | 0.9442735897414151 | 0.5106081237929558 |
| 0.5567037532004454 | 0.7744216787031513 | 0.5203001300452318 |
| 0.7189016993226034 | 0.7695506035716544 | 0.4837153712822223 |
| 0.7185570749408985 | 0.9416509762855473 | 0.4795745119512365 |
| 0.5581868014921604 | 0.9417235403598130 | 0.4997057611818307 |
| 0.5572475529698913 | 0.6094295280798608 | 0.4970789398264835 |
| 0.8765839871911245 | 0.9338744234004113 | 0.4738311506337377 |
| 0.3805681977522949 | 0.4326550929410309 | 0.4979326945335338 |
| 0.3823509943895601 | 0.6157244607002994 | 0.6469284590610027 |
| 0.9973972862968351 | 0.1643945233424680 | 0.4890432782752033 |

|                    |                     |                    |
|--------------------|---------------------|--------------------|
| 0.3267221977041474 | 0.3328493970641391  | 0.4757014639870599 |
| 0.1602004259622898 | 0.4889246512774533  | 0.5336015634062771 |
| 0.3283605662907988 | 0.4897587672820571  | 0.5258588269638098 |
| 0.1630001006122119 | 0.1678517711266545  | 0.4695118710815124 |
| 0.9981942407000918 | 0.3296784572073617  | 0.4933954072119040 |
| 0.9956647601697803 | 0.9934075580815299  | 0.4785332915528234 |
| 0.1631505676164441 | 0.3269440335159466  | 0.5138357993155056 |
| 0.5115078153855472 | 0.1683118211073704  | 0.4726790258219593 |
| 0.8264855359253646 | 0.3274350272971108  | 0.5382278898552438 |
| 0.6586414664376841 | 0.4897008467487198  | 0.5280576572344281 |
| 0.8262444018148941 | 0.4946445940591226  | 0.5348054373121244 |
| 0.6596307763381597 | 0.1636116471628836  | 0.5331619738756900 |
| 0.5100565783304029 | 0.3330829850766905  | 0.4722277978269520 |
| 0.4986393360669166 | -0.0017026031392327 | 0.5042530526012031 |
| 0.6671046187737856 | 0.3300950527990179  | 0.5089686601394879 |
| 0.0012242417482023 | 0.6609684519970044  | 0.4821003412190182 |
| 0.3304487286521838 | 0.8283251239356586  | 0.5175335313233799 |
| 0.1620392379982784 | 0.9916842683394231  | 0.5061547809925687 |
| 0.3290974562773540 | 0.9961345142061921  | 0.5158786928241306 |
| 0.1631001544533753 | 0.6621536926238516  | 0.5211382314561319 |
| 0.0034903203883949 | 0.8266997081268364  | 0.4726590153174008 |
| 0.9924159678826766 | 0.4929993567840426  | 0.5158867485418031 |
| 0.1676554470889595 | 0.8270522635928225  | 0.4963239788481330 |
| 0.5026638665426718 | 0.6638269415812543  | 0.5241387622274924 |
| 0.8232370282645750 | 0.8242010114371815  | 0.4727344504460476 |
| 0.6569184928514007 | 0.9881156563016218  | 0.4731918002357491 |
| 0.8223034804422458 | 0.9885289412787163  | 0.4644599349735989 |
| 0.6573645140955849 | 0.6617073035886737  | 0.4743774685882169 |
| 0.5036116547866362 | 0.8323705706166892  | 0.5273817512519390 |
| 0.4970874119081838 | 0.4930186810836480  | 0.4975298168191644 |
| 0.6647926345729754 | 0.8288332278856684  | 0.5072768418653236 |
| 0.4570799791144137 | 0.6713658898661812  | 0.6761801834221244 |
| 0.3283906556914796 | 0.5431913779649330  | 0.6788320571284491 |

\*CH<sub>3</sub> , Energy without entropy=-522.54 eV

1.0000000000000000

|                     |                     |                     |
|---------------------|---------------------|---------------------|
| 14.2659997940000007 | 0.0000000000000000  | 0.0000000000000000  |
| -7.1329998970000004 | 12.3547182319999997 | 0.0000000000000000  |
| 0.0000000000000000  | 0.0000000000000000  | 18.0000000000000000 |

| B | C  | N  | H |
|---|----|----|---|
| 4 | 25 | 32 | 3 |

Direct

|                    |                    |                    |
|--------------------|--------------------|--------------------|
| 0.3888996440547067 | 0.6037001634037252 | 0.5542578711051688 |
| 0.2163445951377630 | 0.6044508333112787 | 0.5529695998977756 |
| 0.3886216339947667 | 0.7760873872591094 | 0.5510722745218033 |

|                    |                    |                    |
|--------------------|--------------------|--------------------|
| 0.3314875655806839 | 0.6627212270561785 | 0.5995811703987726 |
| 0.0473405570294130 | 0.2700811911058660 | 0.4974147462851545 |
| 0.2183072770522961 | 0.2712189333852865 | 0.4859169593554552 |
| 0.2174365028215494 | 0.4359559603811863 | 0.5215327258007270 |
| 0.0476919603298295 | 0.4318511894603926 | 0.5098577085223712 |
| 0.0535820705261383 | 0.1121693628293126 | 0.4823392699400655 |
| 0.5601679711250312 | 0.2762627307140909 | 0.4836578873022376 |
| 0.7196769133140356 | 0.2720624181900374 | 0.5287428368120721 |
| 0.7193858205642712 | 0.4423739551261750 | 0.5258964510438591 |
| 0.5595496549647787 | 0.4343613458337125 | 0.4994985994392201 |
| 0.5606620814682831 | 0.1190583800918715 | 0.5036331476114516 |
| 0.8750785785548553 | 0.4353655902615059 | 0.5293659415118436 |
| 0.0517875432232728 | 0.7712145076585594 | 0.4844987098913296 |
| 0.2180652625809941 | 0.7738180497116159 | 0.5204120501178778 |
| 0.2189479802953429 | 0.9440095458645357 | 0.5094598343878535 |
| 0.0550446129322541 | 0.9351527957682069 | 0.4857539624585220 |
| 0.0496152473054904 | 0.6093008914416655 | 0.5043857608341654 |
| 0.3821667936206988 | 0.9448461531076432 | 0.5120236081961057 |
| 0.5554296034528280 | 0.7742579730988518 | 0.5187075198229192 |
| 0.7184475622994602 | 0.7700859821007757 | 0.4855491043787253 |
| 0.7175155301531346 | 0.9409620456451582 | 0.4797630439546146 |
| 0.5566975916595038 | 0.9412492099506092 | 0.4983215357550952 |
| 0.5567459987158569 | 0.6091059915660257 | 0.4974746240872073 |
| 0.8762364459724274 | 0.9343505739613189 | 0.4758826158775325 |
| 0.3810448782577014 | 0.4328734437243074 | 0.4981277040323775 |
| 0.3214988631877795 | 0.6711989030656229 | 0.6904589577747479 |
| 0.9974763492392892 | 0.1648904462920621 | 0.4902292359410584 |
| 0.3273595267461231 | 0.3323416310587335 | 0.4784238511906085 |
| 0.1606172209783449 | 0.4912463676235200 | 0.5283468502377087 |
| 0.3298438111413696 | 0.4917411851217501 | 0.5245378098952631 |
| 0.1627366142357196 | 0.1675742040197457 | 0.4719472600988251 |
| 0.9976002512833095 | 0.3301403533544678 | 0.4930123043211259 |
| 0.9949990858196033 | 0.9937993321983098 | 0.4793554846903861 |
| 0.1631818214911213 | 0.3288078589049312 | 0.5090901011301688 |
| 0.5121354072981233 | 0.1691252370455092 | 0.4726469894521326 |
| 0.8263121068532692 | 0.3276627446797844 | 0.5386406548493357 |
| 0.6584498463223470 | 0.4895683998498559 | 0.5294823675335321 |
| 0.8265552226190926 | 0.4951137632034877 | 0.5347730682437289 |
| 0.6592254961138770 | 0.1638831807987486 | 0.5341837538080824 |
| 0.5111510336293125 | 0.3340739112425472 | 0.4715112365873608 |
| 0.4979652609124660 | 0.9987324056194558 | 0.5045664353000936 |
| 0.6670482292648110 | 0.3304258695320004 | 0.5101142735802024 |
| 0.0027536567773898 | 0.6612489826447711 | 0.4795176116053117 |
| 0.3299050952082578 | 0.8302033214088016 | 0.5239971895526222 |

|                    |                    |                    |
|--------------------|--------------------|--------------------|
| 0.1614619764280492 | 0.9920517960795214 | 0.5046742765788845 |
| 0.3287482759473154 | 0.9967802481427739 | 0.5120078492840103 |
| 0.1611898620743926 | 0.6619940087950785 | 0.5263593068018996 |
| 0.0042441560567461 | 0.8275078694597179 | 0.4705727299517876 |
| 0.9918949271737856 | 0.4930103927910966 | 0.5149332185419314 |
| 0.1639353526651647 | 0.8269445019645411 | 0.5083047531973988 |
| 0.5004426485165414 | 0.6622176199258100 | 0.5241790048975886 |
| 0.8233570162343937 | 0.8248756539823914 | 0.4771100658183721 |
| 0.6558131736856520 | 0.9884929418501802 | 0.4734853143501598 |
| 0.8215220087755514 | 0.9887681843910455 | 0.4662649123457343 |
| 0.6573466890404210 | 0.6614989300534939 | 0.4766253234657717 |
| 0.5005897027025772 | 0.8310747075616279 | 0.5237442951122711 |
| 0.4973952349340479 | 0.4928375195969535 | 0.4979225322614535 |
| 0.6623194464089919 | 0.8280895400905510 | 0.5044296654466949 |
| 0.4013776847818099 | 0.7164291762656687 | 0.7173312985365062 |
| 0.2774020387520624 | 0.5907838466866699 | 0.7167359851375416 |
| 0.2767871717135317 | 0.7136071976897705 | 0.7041165861373962 |

CH<sub>4</sub>, Energy without entropy=-525.91 eV

1.0000000000000000

14.2659997940000007 0.0000000000000000 0.0000000000000000

-7.1329998970000004 12.3547182319999997 0.0000000000000000

0.0000000000000000 0.0000000000000000 18.0000000000000000

B C N H

4 25 32 4

Direct

|                    |                    |                    |
|--------------------|--------------------|--------------------|
| 0.3879411545962161 | 0.6017413509165694 | 0.5441745495789095 |
| 0.2133434030402620 | 0.6023699713023439 | 0.5483616834234569 |
| 0.3885415083482852 | 0.7766132634202074 | 0.5470556840742198 |
| 0.3308708723933202 | 0.6598462755081392 | 0.5814901835146117 |
| 0.0439311780592322 | 0.2684600649010975 | 0.4920820449670140 |
| 0.2172992090328169 | 0.2699925386000667 | 0.4771858083683653 |
| 0.2157714885864458 | 0.4349462041181874 | 0.5140597142932439 |
| 0.0448266289485761 | 0.4300614530515379 | 0.5057942018714975 |
| 0.0519955342624116 | 0.1115550788659996 | 0.4764895182465498 |
| 0.5593123849725773 | 0.2752826511650171 | 0.4816484783389931 |
| 0.7184642458405035 | 0.2716228580910280 | 0.5283661026198889 |
| 0.7178891963351859 | 0.4418258479433262 | 0.5238542315377033 |
| 0.5583955381644574 | 0.4335935025512037 | 0.4954832836791866 |
| 0.5599249939918488 | 0.1184315145977985 | 0.5025284769311421 |
| 0.8737587601041237 | 0.4351127246974869 | 0.5283576253533881 |
| 0.0500485727950180 | 0.7706780248904417 | 0.4810545936885341 |
| 0.2173743219769691 | 0.7733057452285864 | 0.5157177404367543 |
| 0.2188586272618110 | 0.9454376716257324 | 0.5079564874164505 |
| 0.0542820676973080 | 0.9352814032544055 | 0.4829947791072899 |

|                     |                     |                    |
|---------------------|---------------------|--------------------|
| 0.0471951126847627  | 0.6088025173655451  | 0.5016214927162370 |
| 0.3814527100777270  | 0.9455123213854418  | 0.5106980224721073 |
| 0.5550119106527958  | 0.7737671606992148  | 0.5141816267058333 |
| 0.7183612382863613  | 0.7693837064642121  | 0.4809082593954543 |
| 0.7172349822093091  | 0.9417961391297405  | 0.4756298445634052 |
| 0.5565253929540743  | 0.9414032299266493  | 0.4960752445613238 |
| 0.5568378042347317  | 0.6085454231889075  | 0.4915973410792888 |
| 0.8753811284475731  | 0.9340471459712301  | 0.4707055014353638 |
| 0.3797741928587152  | 0.4311574119452097  | 0.4899606087631111 |
| 0.3396786373032435  | 0.6714331225624386  | 0.7594685703512246 |
| 0.9952636615797193  | 0.1634408173859400  | 0.4851848025041577 |
| 0.3256528399076812  | 0.3305870124446221  | 0.4693001414251787 |
| 0.1583935300368266  | 0.4885528755443939  | 0.5227745216818925 |
| 0.3275632520417874  | 0.4893407989214499  | 0.5157239050565228 |
| 0.1607534468939023  | 0.1663552816851050  | 0.4634542537032215 |
| 0.9942200348145717  | 0.3277278490953085  | 0.4890594545467756 |
| 0.9938892475780959  | 0.9934327625548046  | 0.4751548138934794 |
| 0.1616084101127036  | 0.3272728734746997  | 0.5033283564796459 |
| 0.5115596032444686  | 0.1680793945752419  | 0.4707019994051760 |
| 0.8249449464688126  | 0.3273379960993142  | 0.5387708639444259 |
| 0.6569058143495402  | 0.4891463838860867  | 0.5259632106792583 |
| 0.8248619223508422  | 0.4946838716094738  | 0.5331692601409178 |
| 0.6578714514690743  | 0.1632464344547289  | 0.5339459466702676 |
| 0.5101778038224685  | 0.3326236365384594  | 0.4684620544284403 |
| 0.4971864524763212  | -0.0016554234115388 | 0.5032189563725529 |
| 0.6657291942286453  | 0.3295812178351056  | 0.5088558441070966 |
| -0.0000092499725628 | 0.6612304411456756  | 0.4775569071329405 |
| 0.3283074836248614  | 0.8303061514836653  | 0.5207988692090810 |
| 0.1599120670770937  | 0.9923453892040754  | 0.5045086754211384 |
| 0.3276521112933599  | 0.9976596532977225  | 0.5133967496439721 |
| 0.1591191924327530  | 0.6622745728721576  | 0.5228572054814999 |
| 0.0032901326101137  | 0.8277181338143075  | 0.4677287471734574 |
| 0.9899023803316080  | 0.4922334157844266  | 0.5125378745912248 |
| 0.1642020689611508  | 0.8271810335284968  | 0.5020148254325116 |
| 0.5011331701884700  | 0.6622075332500927  | 0.5172098567608523 |
| 0.8229623903842564  | 0.8246587421443776  | 0.4711445639570840 |
| 0.6557587024683916  | 0.9887606750642475  | 0.4699170242224989 |
| 0.8207387262077019  | 0.9884763656968881  | 0.4602400269728458 |
| 0.6581215519141806  | 0.6615660914450309  | 0.4712791611447740 |
| 0.5016841561130312  | 0.8313103570331239  | 0.5205039234735591 |
| 0.4964673625225667  | 0.4918630460646553  | 0.4917506016195364 |
| 0.6635013222068261  | 0.8285796999269930  | 0.5031458596855630 |
| 0.4257540857659933  | 0.7309930462353935  | 0.7517199601135299 |
| 0.3176780887111499  | 0.6026042261880000  | 0.7222008282820791 |



0.2907846049814899 0.7086732418864193 0.7452499736562457  
0.3247453806854490 0.6438181678732894 0.8174281004960455

**Structural coordinate information of C1 product is generated at the B<sub>down</sub> site on catalyst B<sub>4</sub>@g-C<sub>3</sub>N<sub>4</sub>**

\*CO , Energy without entropy=-516.94 eV

1.0000000000000000  
14.2659997940000007 0.0000000000000000 0.0000000000000000  
-7.1329998970000004 12.3547182319999997 0.0000000000000000  
0.0000000000000000 0.0000000000000000 18.0000000000000000

B C N O  
4 25 32 1

Direct

0.4027804097781172 0.5981440084048033 0.5621762806883496  
0.2196492533607508 0.6073755294334249 0.5492346871739681  
0.3950512758427215 0.7818041188639795 0.5474432265730973  
0.3371061982433033 0.6653596675769148 0.5817553567208433  
0.0504514310842739 0.2749743343989743 0.4881631119163901  
0.2230790103077556 0.2762659358501470 0.4728743755284532  
0.2217929630613853 0.4404684445638855 0.5124672674377996  
0.0511439502070615 0.4357938256303086 0.5052519040660358  
0.0580664824775452 0.1174389010662229 0.4737836193867463  
0.5648505219246743 0.2807545846760782 0.4788066284070965  
0.7241272409640036 0.2776858948319615 0.5258885550274803  
0.7238626997228489 0.4478402445679390 0.5201279336128439  
0.5640617587619592 0.4392601038126748 0.4921231701482270  
0.5653758147621006 0.1241227218432062 0.5010638419457263  
0.8796725603248287 0.4410724221293011 0.5258180446958052  
0.0568742550656299 0.7766812903830591 0.4813959520825486  
0.2236273427867562 0.7787205054979255 0.5166845478045609  
0.2243640191973279 0.9505790317887541 0.5082532211072630  
0.0603606941725167 0.9409043087012853 0.4816868581849656  
0.0545271308301481 0.6150207643991475 0.5020058291372023  
0.3869508292789574 0.9504072306679703 0.5116636281379966  
0.5608237640430683 0.7790930071785952 0.5124365654301218  
0.7231472148740165 0.7747936869827142 0.4752596050595345  
0.7224138262473315 0.9472065335562335 0.4726562322264167  
0.5626313218411835 0.9473053051381722 0.4959311075457226  
0.5628296048053794 0.6145539259382941 0.4899138668200361  
0.8811055783374202 0.9397409576591147 0.4679281091846122  
0.3847981313360658 0.4365168433177203 0.4883307363331664  
0.4192578053692174 0.5732903878554967 0.6430390861652538  
0.0018766795067200 0.1698620998683781 0.4832778932824164  
0.3318912506130838 0.3371383869905557 0.4653216029649385  
0.1635157067646277 0.4932311496304870 0.5243099367154400

|                     |                    |                    |
|---------------------|--------------------|--------------------|
| 0.3334738016560801  | 0.4928400779905881 | 0.5177532096018892 |
| 0.1665795009002637  | 0.1722549160024093 | 0.4604498517237288 |
| 0.0002745675902829  | 0.3345139554168589 | 0.4864610852638521 |
| -0.0003024375739033 | 0.9989716719231512 | 0.4728839425443315 |
| 0.1679578973401927  | 0.3352479434128214 | 0.4958026933602986 |
| 0.5169553093775554  | 0.1732999718150887 | 0.4686497159760024 |
| 0.8306657318320457  | 0.3334683794942861 | 0.5363138534652173 |
| 0.6629715139143859  | 0.4951873694421377 | 0.5220033694023540 |
| 0.8308402627159283  | 0.5007023567212180 | 0.5297529731241839 |
| 0.6634050052716487  | 0.1695731989189675 | 0.5324471356206584 |
| 0.5156875699727888  | 0.3380797842316310 | 0.4655625527290767 |
| 0.5027821704807960  | 0.0038320269823331 | 0.5031377921988638 |
| 0.6715923065133621  | 0.3355131097516313 | 0.5055454413903183 |
| 0.0075185634683112  | 0.6672542456623893 | 0.4770138472443046 |
| 0.3341632509257050  | 0.8353253094760045 | 0.5217725978589735 |
| 0.1660605452162056  | 0.9982133254439894 | 0.5029731287467617 |
| 0.3333181211841187  | 0.0028631523453767 | 0.5136556637829264 |
| 0.1657712250417101  | 0.6678693188205143 | 0.5238311679627148 |
| 0.0096007781230847  | 0.8330335682758077 | 0.4667252935567893 |
| 0.9965096129594373  | 0.4982477662274857 | 0.5118125947476332 |
| 0.1693249987454737  | 0.8328754021487756 | 0.5047726886977061 |
| 0.5099448469039979  | 0.6678994214221696 | 0.5206064289646583 |
| 0.8279876345386246  | 0.8301203764290150 | 0.4672005765880229 |
| 0.6611475013385616  | 0.9952237346583912 | 0.4690746935042528 |
| 0.8265693634078048  | 0.9947300848374733 | 0.4596494449998946 |
| 0.6621534310138364  | 0.6662511196496238 | 0.4657750814857847 |
| 0.5084742065982157  | 0.8377801112416497 | 0.5214395337770457 |
| 0.5018843876928428  | 0.4975469010384654 | 0.4893758524761391 |
| 0.6661528223504697  | 0.8325467838363563 | 0.4942156112467314 |
| 0.4188587316073831  | 0.5613684331796499 | 0.7071393284478303 |

\*CHO , Energy without entropy=-521.14 eV

1.0000000000000000

|                     |                     |                     |
|---------------------|---------------------|---------------------|
| 14.2659997940000007 | 0.0000000000000000  | 0.0000000000000000  |
| -7.1329998970000004 | 12.3547182319999997 | 0.0000000000000000  |
| 0.0000000000000000  | 0.0000000000000000  | 18.0000000000000000 |

| B | C  | N  | O | H |
|---|----|----|---|---|
| 4 | 25 | 32 | 1 | 1 |

Direct

|                    |                    |                    |
|--------------------|--------------------|--------------------|
| 0.4042591761335276 | 0.5979440783222555 | 0.5691416316178060 |
| 0.2200618198699115 | 0.6097717864500989 | 0.5487699414410403 |
| 0.3940044065882566 | 0.7828962187442277 | 0.5458290528042692 |
| 0.3385017606922340 | 0.6662173288697416 | 0.5804852679321738 |
| 0.0509145593974000 | 0.2768367177437978 | 0.4885228888371331 |
| 0.2232759566954522 | 0.2780665873805475 | 0.4753778025362793 |

|                     |                    |                    |
|---------------------|--------------------|--------------------|
| 0.2230548801740818  | 0.4426866371939616 | 0.5144039354384214 |
| 0.0522371145196648  | 0.4375627485455011 | 0.5058628332635347 |
| 0.0579578260742422  | 0.1193097220688747 | 0.4734220751061092 |
| 0.5648859770316541  | 0.2825832832248698 | 0.4810064540714291 |
| 0.7243065119669290  | 0.2786634006713598 | 0.5258378904985983 |
| 0.7237845944078659  | 0.4487761030705993 | 0.5229389122712971 |
| 0.5640089696876970  | 0.4409090545455938 | 0.4956944052233246 |
| 0.5655914642301161  | 0.1252702252724616 | 0.5002833140854643 |
| 0.8800184870945755  | 0.4422175102917272 | 0.5264830065302759 |
| 0.0565454741760005  | 0.7779819711760516 | 0.4805695748327132 |
| 0.2229933248585155  | 0.7801754777952774 | 0.5157407387705729 |
| 0.2236757357631202  | 0.9512053763904689 | 0.5058667020290845 |
| 0.0600395277800319  | 0.9419839604172280 | 0.4799596520390579 |
| 0.0541749842952214  | 0.6163894199184701 | 0.5020825207138788 |
| 0.3866014128895637  | 0.9514560472927417 | 0.5090268514436906 |
| 0.5598417848297818  | 0.7792078330167993 | 0.5123439804144175 |
| 0.7230256607570315  | 0.7755073734660354 | 0.4766047756908059 |
| 0.7214780813898113  | 0.9473766235672602 | 0.4706731251370001 |
| 0.5620613547505923  | 0.9474059594629871 | 0.4941534780893000 |
| 0.5630328820695447  | 0.6161069421462959 | 0.4930872317556904 |
| 0.8803196494918141  | 0.9405725157705926 | 0.4670806742938405 |
| 0.3842984624744066  | 0.4377091382471295 | 0.4927572462413375 |
| 0.4375786126205954  | 0.5579248193251383 | 0.6433734456956696 |
| 0.0015565098246867  | 0.1711509384962354 | 0.4823824695668379 |
| 0.3322918100706359  | 0.3381703579385120 | 0.4693115529859091 |
| 0.1640637301505612  | 0.4950108718719760 | 0.5244634722433679 |
| 0.3334749745855958  | 0.4945732244717199 | 0.5193213346843040 |
| 0.1673877550492892  | 0.1742600050175727 | 0.4616183719502545 |
| 0.0008607446309932  | 0.3356913395866354 | 0.4872978548964910 |
| -0.0005641093931999 | 0.0006437389825530 | 0.4716443484237433 |
| 0.1680580096163148  | 0.3361958218276803 | 0.4973570609126954 |
| 0.5170254967219605  | 0.1752839121533085 | 0.4695187417646089 |
| 0.8310141598977498  | 0.3343574779366023 | 0.5356315502159484 |
| 0.6628655186521589  | 0.4961555562752919 | 0.5257352674602194 |
| 0.8310656908938161  | 0.5016642725132002 | 0.5316327599113826 |
| 0.6640491171505295  | 0.1701345795817130 | 0.5308293580649590 |
| 0.5159281814449593  | 0.3402348372582156 | 0.4682354265444262 |
| 0.5025254351488888  | 0.0046616596855175 | 0.5010717423827891 |
| 0.6712108858772627  | 0.3366410899438131 | 0.5080237891713855 |
| 0.0070020151149807  | 0.6681412150831557 | 0.4767426572631663 |
| 0.3338009400666341  | 0.8367824291937795 | 0.5204657917467906 |
| 0.1656406584177989  | 0.9992477688293664 | 0.5004694478379196 |
| 0.3328364568312300  | 0.0036719363396894 | 0.5098959191606536 |
| 0.1652679775537561  | 0.6691252869801257 | 0.5237323565362905 |

|                    |                    |                    |
|--------------------|--------------------|--------------------|
| 0.0091057799465956 | 0.8342348483626905 | 0.4652042151870098 |
| 0.9965962301136223 | 0.4995407550898988 | 0.5122612405493657 |
| 0.1682167474769156 | 0.8339876544817653 | 0.5040361299467420 |
| 0.5093125654152286 | 0.6692230621380800 | 0.5213371686882589 |
| 0.8279503507561651 | 0.8307544538890004 | 0.4684122594530287 |
| 0.6607598017791916 | 0.9953314211691152 | 0.4668937897292140 |
| 0.8259511527672144 | 0.9949617179308139 | 0.4571325037450418 |
| 0.6626149841345038 | 0.6668285188402254 | 0.4688852279326154 |
| 0.5078204999704925 | 0.8385399012031443 | 0.5198950129455239 |
| 0.5019399405781086 | 0.4989929666502327 | 0.4932383566105401 |
| 0.6659932276444310 | 0.8333874827812798 | 0.4939662497898379 |
| 0.3883407217197888 | 0.4655036944649088 | 0.6688317399391861 |
| 0.5088054516815048 | 0.6222002316440620 | 0.6757353909552607 |

\*CHOH , Energy without entropy=-525.48 eV

1.0000000000000000

|                     |                     |                     |
|---------------------|---------------------|---------------------|
| 14.2659997940000007 | 0.0000000000000000  | 0.0000000000000000  |
| -7.1329998970000004 | 12.3547182319999997 | 0.0000000000000000  |
| 0.0000000000000000  | 0.0000000000000000  | 18.0000000000000000 |

| B | C  | N  | O | H |
|---|----|----|---|---|
| 4 | 25 | 32 | 1 | 2 |

Direct

|                    |                    |                    |
|--------------------|--------------------|--------------------|
| 0.4049299186586231 | 0.6019318965351909 | 0.5481841668502021 |
| 0.2261144864746144 | 0.6056045052817937 | 0.5511110667265245 |
| 0.4020967858241419 | 0.7797111347736255 | 0.5472323520178802 |
| 0.3407897835033179 | 0.6689164872686438 | 0.5939141421793630 |
| 0.0554163690627403 | 0.2703914335289356 | 0.4993064555791111 |
| 0.2277073262138693 | 0.2736856072185788 | 0.4767720370680536 |
| 0.2276597265673919 | 0.4382865333984294 | 0.5158917474494115 |
| 0.0553649990471035 | 0.4318953869649249 | 0.5122017050129873 |
| 0.0633689767633226 | 0.1141881261263012 | 0.4794353745011160 |
| 0.5690302173776668 | 0.2784912073903510 | 0.4774615400697236 |
| 0.7270754500596794 | 0.2751375132708124 | 0.5269319111868059 |
| 0.7273915502945717 | 0.4454423598316199 | 0.5201563946700126 |
| 0.5684002569292507 | 0.4374198124381213 | 0.4899127272515303 |
| 0.5697095311598993 | 0.1216828657643876 | 0.4996415233235766 |
| 0.8830086454184867 | 0.4381124805884939 | 0.5289108231885387 |
| 0.0610091560630199 | 0.7724716773749093 | 0.4843326920732526 |
| 0.2299072599257710 | 0.7750371497057995 | 0.5124187846100882 |
| 0.2309625601792636 | 0.9474173901623579 | 0.5061560205587331 |
| 0.0652326770434275 | 0.9371949881464825 | 0.4844191077675720 |
| 0.0587305647772873 | 0.6104261650847872 | 0.5042107167024116 |
| 0.3933764976066950 | 0.9466685134942073 | 0.5082449778629117 |
| 0.5674840633082234 | 0.7775685828565371 | 0.5107932198543189 |
| 0.7289658148026441 | 0.7727686694753196 | 0.4721541125282075 |

|                    |                     |                    |
|--------------------|---------------------|--------------------|
| 0.7297773990710550 | 0.9460819094008907  | 0.4738786337787206 |
| 0.5690701865874176 | 0.9455524338674939  | 0.4948339877438397 |
| 0.5670346550891749 | 0.6127715821427715  | 0.4844087345309412 |
| 0.8870057124112689 | 0.9371483562088692  | 0.4674455819280877 |
| 0.3898808857457248 | 0.4357507370145069  | 0.4860704025622719 |
| 0.3918836941341646 | 0.6081942459729273  | 0.6349457814314561 |
| 0.0069048477954888 | 0.1647798790857773  | 0.4934344941540767 |
| 0.3358435097955266 | 0.3347825822198484  | 0.4665506770900298 |
| 0.1699950168914801 | 0.4915355598511866  | 0.5279378866273703 |
| 0.3381018722109443 | 0.4942979155321545  | 0.5112509606239358 |
| 0.1715256083527199 | 0.1699508367854232  | 0.4631780360979015 |
| 0.0048087849881142 | 0.3287091933919566  | 0.4985929164157724 |
| 0.0054474060989551 | -0.0043526772947905 | 0.4757344132080957 |
| 0.1734726987042088 | 0.3306547016929349  | 0.5046708168098575 |
| 0.5215688165879868 | 0.1709712289348816  | 0.4668476094344912 |
| 0.8331372826386447 | 0.3304294196538237  | 0.5391506261996668 |
| 0.6667066766707136 | 0.4933083356366632  | 0.5205884333665278 |
| 0.8339933362349142 | 0.4977210675737651  | 0.5314165895230827 |
| 0.6664853348401414 | 0.1667710444504660  | 0.5324912997858444 |
| 0.5202838828058683 | 0.3360889296835743  | 0.4633631207521657 |
| 0.5084028903838905 | 0.0010815165621163  | 0.5004972739188708 |
| 0.6750375829443037 | 0.3330002348349577  | 0.5054520941592019 |
| 0.0103872618029649 | 0.6630624023307575  | 0.4833233810391345 |
| 0.3405367963009095 | 0.8307884525729369  | 0.5162988027915962 |
| 0.1722383847239772 | 0.9946418903667457  | 0.5035571875970464 |
| 0.3392606238708250 | -0.0012476206592053 | 0.5132302238098790 |
| 0.1725827115060630 | 0.6644297489807706  | 0.5214011021501461 |
| 0.0122621346964967 | 0.8285037997806284  | 0.4741080329882524 |
| 0.0005419390956197 | 0.4944559037797303  | 0.5161114081203857 |
| 0.1768235647335469 | 0.8292818888461807  | 0.4979623721454586 |
| 0.5129249126217547 | 0.6673210182720974  | 0.5116612968270351 |
| 0.8333560074305471 | 0.8277941815103410  | 0.4610891807470593 |
| 0.6684130669402065 | 0.9931940423471227  | 0.4690669323658366 |
| 0.8337648466703502 | 0.9932817904709926  | 0.4597808470513358 |
| 0.6671822812465139 | 0.6651930479640671  | 0.4614337879885663 |
| 0.5144707200997604 | 0.8352454043380318  | 0.5199704591934819 |
| 0.5064657125445789 | 0.4961529200096005  | 0.4857133670352779 |
| 0.6759903919288054 | 0.8319961917754682  | 0.4991202663403668 |
| 0.3228115135458648 | 0.5052444412311490  | 0.6686958692638542 |
| 0.4685167754626098 | 0.6553494887969983  | 0.6651265898783998 |
| 0.2679697147348903 | 0.5113714144027699  | 0.6968448864923330 |

\*CH<sub>2</sub>OH , Energy without entropy=-528.93 eV

1.0000000000000000

|                     |                    |                    |
|---------------------|--------------------|--------------------|
| 14.2659997940000007 | 0.0000000000000000 | 0.0000000000000000 |
|---------------------|--------------------|--------------------|

-7.1329998970000004 12.3547182319999997 0.0000000000000000  
0.0000000000000000 0.0000000000000000 18.0000000000000000

B C N O H  
4 25 32 1 3

Direct

|                    |                    |                    |
|--------------------|--------------------|--------------------|
| 0.4020398528963872 | 0.6043431015268758 | 0.5357041773293200 |
| 0.2296911512264911 | 0.6035705089300505 | 0.5513214774471071 |
| 0.4040081447815708 | 0.7765223183871289 | 0.5472813501263013 |
| 0.3500655189325427 | 0.6595683694873445 | 0.5907745231053863 |
| 0.0586802915747962 | 0.2691303948803879 | 0.4968151581418686 |
| 0.2290726293743187 | 0.2719476256809111 | 0.4727474971035673 |
| 0.2294601667635912 | 0.4367202267834194 | 0.5101567706436868 |
| 0.0581204683580485 | 0.4307227333050506 | 0.5101117931446495 |
| 0.0654936382609761 | 0.1122181241133775 | 0.4782327659498216 |
| 0.5713219206819691 | 0.2758635981798730 | 0.4734649893005340 |
| 0.7290760622701039 | 0.2728707887268603 | 0.5240216873718035 |
| 0.7293576815661548 | 0.4430483970679719 | 0.5163742613251425 |
| 0.5707427839718460 | 0.4346981612796446 | 0.4847555023464890 |
| 0.5715494015387784 | 0.1193346650528982 | 0.4975848360220709 |
| 0.8848273946231395 | 0.4358226315904551 | 0.5264718691581483 |
| 0.0641311328886864 | 0.7716258982727985 | 0.4873992338255466 |
| 0.2311676038347032 | 0.7741084582209402 | 0.5213101975388418 |
| 0.2321176389826081 | 0.9451252728678735 | 0.5085890129686788 |
| 0.0677828511072118 | 0.9358731340380754 | 0.4848732051405282 |
| 0.0619057576775764 | 0.6094442577339054 | 0.5060252017042666 |
| 0.3949356364252152 | 0.9447467558592872 | 0.5094731766836273 |
| 0.5684621844226224 | 0.7749734436933736 | 0.5056938716993006 |
| 0.7308572097171659 | 0.7710113418047320 | 0.4701611698247083 |
| 0.7312949268613852 | 0.9429840422897797 | 0.4716152651623667 |
| 0.5702335046265020 | 0.9428231767126356 | 0.4921216511768536 |
| 0.5689644548143795 | 0.6099041679622977 | 0.4797115717732998 |
| 0.8895085713040333 | 0.9353045073974956 | 0.4677942641350359 |
| 0.3923046224645839 | 0.4336361295943945 | 0.4807262094614892 |
| 0.3653129353419748 | 0.6410154493699435 | 0.6791326522201446 |
| 0.0095702229576436 | 0.1635728407819512 | 0.4930200292338255 |
| 0.3377865432200622 | 0.3327717744316944 | 0.4619617302796108 |
| 0.1726970487233715 | 0.4910679199597491 | 0.5238609142919451 |
| 0.3417989486024756 | 0.4931458337960329 | 0.5074823720704513 |
| 0.1728406912277471 | 0.1675776090009311 | 0.4613459965000639 |
| 0.0072060471367253 | 0.3277676831996898 | 0.4972688154209649 |
| 0.0075700580236408 | 0.9939441537410851 | 0.4754919892718543 |
| 0.1753675572359028 | 0.3298630142219999 | 0.4981006001215541 |
| 0.5236397296100327 | 0.1683003837066304 | 0.4639873036089884 |
| 0.8350806508531636 | 0.3283286044573125 | 0.5366669723815781 |

|                    |                     |                    |
|--------------------|---------------------|--------------------|
| 0.6687429576201424 | 0.4907358901713442  | 0.5159452234353020 |
| 0.8359851513729842 | 0.4955237361678267  | 0.5281464058286033 |
| 0.6685400102553626 | 0.1647911247542764  | 0.5303279788648477 |
| 0.5227394149349471 | 0.3334049200540986  | 0.4583411550658039 |
| 0.5102902415829376 | -0.0010004374061106 | 0.4995633236172834 |
| 0.6773894373740329 | 0.3307337373981757  | 0.5016601742465053 |
| 0.0150656879331516 | 0.6620628253253181  | 0.4826854050194124 |
| 0.3432026844589076 | 0.8302085757650304  | 0.5227909773403859 |
| 0.1749973038343027 | 0.9935416007114585  | 0.5023897621980769 |
| 0.3418898379896895 | 0.9970822255434395  | 0.5100150282786500 |
| 0.1740396607928392 | 0.6622595469616094  | 0.5276427173627817 |
| 0.0163074987696515 | 0.8275623034066956  | 0.4734835104659416 |
| 0.0030912564345585 | 0.4928209470745832  | 0.5153183892685124 |
| 0.1771338353181741 | 0.8277079110606835  | 0.5097399010902856 |
| 0.5129818409416339 | 0.6628941712908644  | 0.5071350877719634 |
| 0.8360034796342677 | 0.8259945817572998  | 0.4633062793739949 |
| 0.6695663589117113 | 0.9912189693570024  | 0.4674834960522918 |
| 0.8357848757351442 | 0.9913259966552878  | 0.4602378698263924 |
| 0.6696426773675555 | 0.6626751682365501  | 0.4589996104946574 |
| 0.5144775605077535 | 0.8320745923420674  | 0.5159214550404140 |
| 0.5088801493954024 | 0.4934859321651207  | 0.4801756645417275 |
| 0.6749718243131415 | 0.8285519805473148  | 0.4911386561624354 |
| 0.3162813185974246 | 0.5268707160662246  | 0.6979729760390468 |
| 0.4514031319779836 | 0.6758935439056565  | 0.6937391812204378 |
| 0.2402576496226041 | 0.4935001997703997  | 0.6843615143601587 |
| 0.3326205884435659 | 0.6800118248109365  | 0.7159662130226851 |

\*CH<sub>2</sub> , Energy without entropy=-519.02 eV

1.0000000000000000

|                     |                     |                     |
|---------------------|---------------------|---------------------|
| 14.2659997940000007 | 0.0000000000000000  | 0.0000000000000000  |
| -7.1329998970000004 | 12.3547182319999997 | 0.0000000000000000  |
| 0.0000000000000000  | 0.0000000000000000  | 18.0000000000000000 |

| B | C  | N  | H |
|---|----|----|---|
| 4 | 25 | 32 | 2 |

Direct

|                    |                    |                    |
|--------------------|--------------------|--------------------|
| 0.4008641738251798 | 0.5970240163536702 | 0.5424184490988306 |
| 0.2268485274270349 | 0.5977703812744393 | 0.5492206293743896 |
| 0.4065343398602028 | 0.7811449589468495 | 0.5582461532274060 |
| 0.3392399412119076 | 0.6423990125425491 | 0.5933192200488427 |
| 0.0569976362654719 | 0.2649054692193851 | 0.4923524161544233 |
| 0.2295960197822445 | 0.2673307871178958 | 0.4706155255453108 |
| 0.2289192615922317 | 0.4332065426962810 | 0.5053911963703318 |
| 0.0572189998569618 | 0.4267291661481516 | 0.5053864528221959 |
| 0.0651187278914653 | 0.1080373287283418 | 0.4759587861301258 |
| 0.5704036418479422 | 0.2703996065474079 | 0.4784776903358028 |

|                    |                    |                    |
|--------------------|--------------------|--------------------|
| 0.7294470629315959 | 0.2679432599730396 | 0.5271514023427052 |
| 0.7296376431854642 | 0.4382548380082278 | 0.5183894641508222 |
| 0.5700326099297488 | 0.4295847584484350 | 0.4891056173821592 |
| 0.5712118057328152 | 0.1140417331245597 | 0.5021873002857573 |
| 0.8851608744385825 | 0.4311230534947114 | 0.5270249303775766 |
| 0.0622764451293379 | 0.7666962590110389 | 0.4861385413110760 |
| 0.2302059617534201 | 0.7694757127882986 | 0.5200834352626914 |
| 0.2313419897501804 | 0.9414937454009217 | 0.5103927202041079 |
| 0.0668969890315526 | 0.9314872123609601 | 0.4852900705909602 |
| 0.0602552930559104 | 0.6048931188685561 | 0.5047548273521825 |
| 0.3935172510496717 | 0.9405558278294577 | 0.5126990191201777 |
| 0.5676927919047806 | 0.7697836292060537 | 0.5134130283894787 |
| 0.7304324584837892 | 0.7659393592759980 | 0.4762505903481773 |
| 0.7300257779968641 | 0.9382524244633594 | 0.4760794938204213 |
| 0.5687351481072442 | 0.9368301751285998 | 0.4968441422034789 |
| 0.5686266151652061 | 0.6051013967428607 | 0.4860813245168673 |
| 0.8882226397039850 | 0.9307050666003974 | 0.4700716468033591 |
| 0.3923246260011339 | 0.4292763989384308 | 0.4813872519283665 |
| 0.3934204984722049 | 0.7489324883975630 | 0.6419884944595812 |
| 0.0087559128929306 | 0.1595731487422063 | 0.4883555704441682 |
| 0.3378645176665375 | 0.3283640976287026 | 0.4613871605597716 |
| 0.1729500731655133 | 0.4874752022677757 | 0.5158453727936559 |
| 0.3404533346132495 | 0.4888538278835317 | 0.5058485564748064 |
| 0.1729894887062177 | 0.1629594449519731 | 0.4591950475091914 |
| 0.0060806099200771 | 0.3231200924496422 | 0.4928430133733812 |
| 0.0067955323356688 | 0.9898455889770205 | 0.4757939656866634 |
| 0.1750405775659607 | 0.3253980303662472 | 0.4961259850094386 |
| 0.5226705966122731 | 0.1627296115856993 | 0.4693179772633562 |
| 0.8357829763597669 | 0.3237076097458190 | 0.5386667586528547 |
| 0.6692068214649812 | 0.4861912912782817 | 0.5183581208436222 |
| 0.8363661189576259 | 0.4908355004805832 | 0.5288537878337412 |
| 0.6687826357872122 | 0.1598043294080750 | 0.5341306043622531 |
| 0.5209598755351785 | 0.3272660159812247 | 0.4643845197728766 |
| 0.5089973202167049 | 0.9934729815812242 | 0.5039098382886497 |
| 0.6772836500025511 | 0.3255046592951713 | 0.5049329896537098 |
| 0.0135143020598745 | 0.6578105738546273 | 0.4811475029901056 |
| 0.3402028251190293 | 0.8251002758091185 | 0.5230228800496806 |
| 0.1734435393102659 | 0.9893545186905828 | 0.5048543542908771 |
| 0.3403202262016528 | 0.9932464470388117 | 0.5148647410167355 |
| 0.1721096889195593 | 0.6582217129744494 | 0.5277592268234439 |
| 0.0152735078857257 | 0.8234935731641925 | 0.4725351790380214 |
| 0.0024105217294370 | 0.4882259957834346 | 0.5133340665242677 |
| 0.1761858388160247 | 0.8232345840554757 | 0.5081544078163743 |
| 0.5140266797619044 | 0.6580647374874149 | 0.5164155217612566 |



|                    |                    |                    |
|--------------------|--------------------|--------------------|
| 0.8351381810529959 | 0.8212996202740502 | 0.4663792797289520 |
| 0.6682366860853689 | 0.9850898692653313 | 0.4710261321130086 |
| 0.8338984190165953 | 0.9859469198123838 | 0.4616617293824654 |
| 0.6690994367195389 | 0.6587180979016782 | 0.4642141546089152 |
| 0.5144285228638400 | 0.8263148253236733 | 0.5204878523384121 |
| 0.5084636218089813 | 0.4885126501892932 | 0.4843976471822550 |
| 0.6762062900264023 | 0.8245014984782640 | 0.5013968989853490 |
| 0.4681149229268278 | 0.7688373567696899 | 0.6716177783366338 |
| 0.3385210435094231 | 0.7664476108678888 | 0.6737816615334805 |

\*CH<sub>3</sub> , Energy without entropy=-522.56 eV

1.0000000000000000

|                     |                     |                     |
|---------------------|---------------------|---------------------|
| 14.2659997940000007 | 0.0000000000000000  | 0.0000000000000000  |
| -7.1329998970000004 | 12.3547182319999997 | 0.0000000000000000  |
| 0.0000000000000000  | 0.0000000000000000  | 18.0000000000000000 |

|   |    |    |   |
|---|----|----|---|
| B | C  | N  | H |
| 4 | 25 | 32 | 3 |

Direct

|                    |                    |                    |
|--------------------|--------------------|--------------------|
| 0.3990055259128434 | 0.5984483588154225 | 0.5460627854967017 |
| 0.2270515342010422 | 0.5996179736476667 | 0.5467235891126752 |
| 0.3993246012673261 | 0.7717591994037662 | 0.5485694430354336 |
| 0.3417779888609013 | 0.6555219886953297 | 0.5939849553416331 |
| 0.0569611416823684 | 0.2655675565974985 | 0.4912751304768374 |
| 0.2278183068703921 | 0.2665278753542549 | 0.4775516254795859 |
| 0.2274012589971307 | 0.4312866444543293 | 0.5137859800405601 |
| 0.0574171980669952 | 0.4273917270344451 | 0.5042661266348070 |
| 0.0631143647263963 | 0.1075625562897386 | 0.4765237875840016 |
| 0.5699743991917697 | 0.2716684473549294 | 0.4778202407624866 |
| 0.7293642490621368 | 0.2684313017434087 | 0.5244698124189586 |
| 0.7294705934675931 | 0.4388473705660210 | 0.5186307338818799 |
| 0.5695415152679908 | 0.4303041498967168 | 0.4911415464130176 |
| 0.5703664461452925 | 0.1148347025729573 | 0.4998730564894007 |
| 0.8850366083153219 | 0.4316685804380522 | 0.5242999235667255 |
| 0.0622366756976409 | 0.7672796118868415 | 0.4811820587877559 |
| 0.2285590589475142 | 0.7695713790142531 | 0.5168279883548278 |
| 0.2290381740679867 | 0.9401081662060262 | 0.5077228090342705 |
| 0.0651970547641404 | 0.9311020129937214 | 0.4825482998266928 |
| 0.0600685902370172 | 0.6052554295877539 | 0.4999187265604764 |
| 0.3922182428595953 | 0.9408049679655478 | 0.5101330069340867 |
| 0.5653381907449198 | 0.7696454964771957 | 0.5122197431725246 |
| 0.7278450078913713 | 0.7658010954265769 | 0.4763109021214121 |
| 0.7273055144634492 | 0.9369394066963573 | 0.4747179033401855 |
| 0.5667668475333169 | 0.9373111561768658 | 0.4947819344445952 |
| 0.5662677264896721 | 0.6047737445540562 | 0.4879635715902473 |
| 0.8860347852621951 | 0.9302226668422856 | 0.4699568438583385 |

|                    |                    |                    |
|--------------------|--------------------|--------------------|
| 0.3907267110762963 | 0.4281508752904650 | 0.4889888141503083 |
| 0.3279648247973928 | 0.6480455991342471 | 0.6852648481910839 |
| 0.0071367602929708 | 0.1602855465314982 | 0.4849818661061229 |
| 0.3368027204691412 | 0.3277338469120097 | 0.4689369194990148 |
| 0.1707808313720773 | 0.4866867250552599 | 0.5216193094655086 |
| 0.3398435690749842 | 0.4868030385290841 | 0.5162268552889141 |
| 0.1719702984228010 | 0.1625645737479030 | 0.4645458382468244 |
| 0.0069158376663761 | 0.3254908875694744 | 0.4877816710152331 |
| 0.0047994050880536 | 0.9893963201205485 | 0.4746059547456865 |
| 0.1730481802618824 | 0.3242968811046994 | 0.5012673816026890 |
| 0.5217930421002389 | 0.1641987569168197 | 0.4679129110371034 |
| 0.8360093055726355 | 0.3241265744531480 | 0.5348715161668962 |
| 0.6687936183364026 | 0.4864276455527115 | 0.5204791739092005 |
| 0.8364808091651786 | 0.4915136502200772 | 0.5282905601003225 |
| 0.6686260333557120 | 0.1603203793856404 | 0.5309385510144443 |
| 0.5206288976866271 | 0.3289635669659519 | 0.4649245454432189 |
| 0.5078319333364493 | 0.9945677235339733 | 0.5017041912535730 |
| 0.6770629635682809 | 0.3264914919964330 | 0.5039421883499486 |
| 0.0131733450029663 | 0.6575491506811264 | 0.4758778932505711 |
| 0.3402806458853302 | 0.8260768677120163 | 0.5214406243585271 |
| 0.1713241677703909 | 0.9880134283512017 | 0.5028527776805384 |
| 0.3388135073871135 | 0.9928975223098091 | 0.5114064311983828 |
| 0.1718574520672091 | 0.6576994575996193 | 0.5215623463789564 |
| 0.0146906403824053 | 0.8236437444256262 | 0.4675707520421852 |
| 0.0019868446899188 | 0.4888990059895677 | 0.5099829502250079 |
| 0.1745375587834938 | 0.8229152031975142 | 0.5048846767042597 |
| 0.5102679790917104 | 0.6574893659276267 | 0.5161181911439743 |
| 0.8328560594540818 | 0.8207385828398515 | 0.4683150412906616 |
| 0.6657820046352459 | 0.9849942020253994 | 0.4696965492977976 |
| 0.8314873132673787 | 0.9852017443891561 | 0.4620151648019266 |
| 0.6665306686286192 | 0.6574361720250248 | 0.4663928033736471 |
| 0.5110620643539794 | 0.8268443921067389 | 0.5199321792171613 |
| 0.5071448556365985 | 0.4884879953912389 | 0.4884635780925323 |
| 0.6717374989648319 | 0.8233301630538852 | 0.4967282964500190 |
| 0.4065899650880008 | 0.6898129084781588 | 0.7141806087123527 |
| 0.2803112609776873 | 0.6849714204123667 | 0.7043879434719852 |
| 0.2851987962952058 | 0.5632411153721084 | 0.7044555339633041 |

CH<sub>4</sub> , Energy without entropy=-525.91 eV

1.0000000000000000

|                     |                     |                     |
|---------------------|---------------------|---------------------|
| 14.2659997940000007 | 0.0000000000000000  | 0.0000000000000000  |
| -7.1329998970000004 | 12.3547182319999997 | 0.0000000000000000  |
| 0.0000000000000000  | 0.0000000000000000  | 18.0000000000000000 |

|   |    |    |   |
|---|----|----|---|
| B | C  | N  | H |
| 4 | 25 | 32 | 4 |

Direct

|                    |                    |                    |
|--------------------|--------------------|--------------------|
| 0.3998550511939676 | 0.5982353880974414 | 0.5395082403268817 |
| 0.2250220723772782 | 0.5987567946331528 | 0.5443281456051935 |
| 0.4003595575294721 | 0.7732025221791722 | 0.5424101519720254 |
| 0.3429008339106193 | 0.6564059403265667 | 0.5769430914164204 |
| 0.0553277748399076 | 0.2647031881114949 | 0.4889598939215231 |
| 0.2285524246552252 | 0.2665670063913434 | 0.4720257080441042 |
| 0.2272337018755507 | 0.4314212274914390 | 0.5096273639451536 |
| 0.0560660371974505 | 0.4263166266018229 | 0.5025496457398425 |
| 0.0634068812374482 | 0.1078892922526165 | 0.4726066689366755 |
| 0.5705603068276223 | 0.2719297126185529 | 0.4762650503213817 |
| 0.7292443475640982 | 0.2682963694605927 | 0.5239470289482221 |
| 0.7289940450990913 | 0.4385502546486979 | 0.5187081554601657 |
| 0.5697055315330783 | 0.4304031724933747 | 0.4896143374826754 |
| 0.5710298704532185 | 0.1149828050395496 | 0.4976350399995956 |
| 0.8847796397814642 | 0.4316480047799451 | 0.5243636663341107 |
| 0.0611716036632465 | 0.7669769529424542 | 0.4782893317409431 |
| 0.2289056878017920 | 0.7697415915986557 | 0.5118319600862427 |
| 0.2303860530344916 | 0.9419825607320980 | 0.5037453971440984 |
| 0.0656290631016048 | 0.9316816625025017 | 0.4793898465743994 |
| 0.0585902532227802 | 0.6051335689553550 | 0.4984065929015093 |
| 0.3928231033861636 | 0.9419447015331481 | 0.5060675189287415 |
| 0.5665790437427743 | 0.7703938025697724 | 0.5088105410391669 |
| 0.7294450211856466 | 0.7658802997608548 | 0.4740747008397156 |
| 0.7288271260634599 | 0.9385584968849113 | 0.4706020937864519 |
| 0.5681910862794628 | 0.9382010119050669 | 0.4912824483420092 |
| 0.5679908473075992 | 0.6051770020864796 | 0.4853435275680461 |
| 0.8867997068038522 | 0.9305464294741529 | 0.4654164944656449 |
| 0.3909638903653322 | 0.4277148196904448 | 0.4845373139583621 |
| 0.3209675948292203 | 0.6437226630785168 | 0.7499415485953140 |
| 0.0067533951815398 | 0.1595632057945288 | 0.4826539095203515 |
| 0.3368805893941448 | 0.3273363534918230 | 0.4635040727197073 |
| 0.1698882044980108 | 0.4849907662121089 | 0.5187949091947409 |
| 0.3390829729617696 | 0.4857788771737318 | 0.5110897885550961 |
| 0.1719168780512480 | 0.1628910028411293 | 0.4584915782204640 |
| 0.0053067540118628 | 0.3237539735310050 | 0.4865653783397164 |
| 0.0052431777887105 | 0.9897283614731989 | 0.4708320467865438 |
| 0.1731888554419293 | 0.3238387024248822 | 0.4986761460389900 |
| 0.5229235585555360 | 0.1646631586883056 | 0.4654754009437985 |
| 0.8356612597311247 | 0.3239464287412506 | 0.5348154622209187 |
| 0.6681954642487002 | 0.4860790463216244 | 0.5201128975375096 |
| 0.8358794312465617 | 0.4912365505316681 | 0.5285941439996503 |
| 0.6687340146244993 | 0.1599592418621419 | 0.5294294442716441 |
| 0.5216058385926592 | 0.3293477160134846 | 0.4627357581379657 |

|                    |                    |                    |
|--------------------|--------------------|--------------------|
| 0.5085298036625167 | 0.9948563300020696 | 0.4984715316644542 |
| 0.6768119448398769 | 0.3262952205334654 | 0.5038199558320855 |
| 0.0112151356289602 | 0.6575444310727790 | 0.4747794786373846 |
| 0.3398844831159685 | 0.8267728243448108 | 0.5163528471468757 |
| 0.1716147916205577 | 0.9890520121718884 | 0.5000916505468531 |
| 0.3392501801883754 | 0.9943222523877389 | 0.5086081878103436 |
| 0.1707448468119757 | 0.6586459214333125 | 0.5190485439327641 |
| 0.0143235101615390 | 0.8239172050649204 | 0.4651266675275603 |
| 0.0012825964537888 | 0.4886169224039071 | 0.5092392273051705 |
| 0.1755299551014389 | 0.8236185220022116 | 0.4989050586905506 |
| 0.5127531068420732 | 0.6587773692793474 | 0.5119456481128219 |
| 0.8340402285979311 | 0.8210979719503788 | 0.4642518238432638 |
| 0.6675623607342475 | 0.9858088321425831 | 0.4653461452941152 |
| 0.8324836315065760 | 0.9854451024084079 | 0.4555667178381609 |
| 0.6688540148655284 | 0.6581052257687069 | 0.4640484162506587 |
| 0.5133584566318934 | 0.8279690939947673 | 0.5155003919883262 |
| 0.5076682152006151 | 0.4885420918854111 | 0.4857443380837858 |
| 0.6749261453120897 | 0.8250293021423569 | 0.4972124880928341 |
| 0.4050530440039135 | 0.6886153438435297 | 0.7304511371803744 |
| 0.2773193974432664 | 0.6834136881834630 | 0.7290463896092028 |
| 0.2822604784514743 | 0.5611124470308481 | 0.7277987314098393 |
| 0.3186152236341498 | 0.6415246580120284 | 0.8108923842908566 |

### Structural coordinate information of the C2 product

\*2CO , Energy without entropy=-532.74 eV

1.0000000000000000

14.2659997940000007 0.0000000000000000 0.0000000000000000

-7.1329998970000004 12.3547182319999997 0.0000000000000000

0.0000000000000000 0.0000000000000000 18.0000000000000000

B C N O  
4 26 32 2

Direct

|                    |                    |                    |
|--------------------|--------------------|--------------------|
| 0.4059085927775978 | 0.5961546363697110 | 0.5634462880232968 |
| 0.2228553513546352 | 0.6098535036954402 | 0.5454124327419738 |
| 0.3923764516656691 | 0.7788221360354410 | 0.5434882044273804 |
| 0.3403911527929147 | 0.6632748757072036 | 0.5915552259785134 |
| 0.0515579720950976 | 0.2761176502905268 | 0.4875922703333377 |
| 0.2230185868991922 | 0.2765336736644576 | 0.4727479401753640 |
| 0.2234405727688505 | 0.4407868433318557 | 0.5129581183903945 |
| 0.0529775450989168 | 0.4376042208165504 | 0.5043767526552472 |
| 0.0574376408451351 | 0.1179530398443009 | 0.4731494997844850 |
| 0.5648914951486329 | 0.2798801718425239 | 0.4784626339041547 |
| 0.7245252785638994 | 0.2768942103456472 | 0.5251607543056029 |
| 0.7243828757851949 | 0.4472872537878221 | 0.5187732280543930 |
| 0.5644551753432113 | 0.4385936230806073 | 0.4910003533031619 |

|                    |                     |                    |
|--------------------|---------------------|--------------------|
| 0.5653642962443056 | 0.1232052764688794  | 0.5007983890129708 |
| 0.8802241388546466 | 0.4404001440389655  | 0.5254393016590813 |
| 0.0562497500204291 | 0.7771877596286019  | 0.4848100631341832 |
| 0.2218896074602816 | 0.7796436924316201  | 0.5218633838273378 |
| 0.2231932928426431 | 0.9502586126106588  | 0.5094856664426536 |
| 0.0598627040713214 | 0.9413333706908616  | 0.4825830809278587 |
| 0.0545573869256209 | 0.6149886242219786  | 0.5035496818339754 |
| 0.3863887719757869 | 0.9499132864405293  | 0.5118127169968723 |
| 0.5592152757494337 | 0.7766812750886414  | 0.5102779257587160 |
| 0.7229026244299124 | 0.7749060997429905  | 0.4744345444214254 |
| 0.7214562002925964 | 0.9452469769439485  | 0.4743046565897500 |
| 0.5600939158577382 | 0.9448579531634081  | 0.4943649086110498 |
| 0.5622853767038569 | 0.6137638956144128  | 0.4873294558856492 |
| 0.8807877860820842 | 0.9396925547589382  | 0.4680819505184700 |
| 0.3853666871923103 | 0.4364227969983304  | 0.4877343968333492 |
| 0.3187179925507695 | 0.6792486239116451  | 0.6695144035170434 |
| 0.4494839453155594 | 0.5708565611707754  | 0.6406119096832199 |
| 0.0020323734373144 | 0.1704637690118079  | 0.4817560593093163 |
| 0.3320619908947444 | 0.3379602789260840  | 0.4632892528193875 |
| 0.1678170192765951 | 0.4968208903810810  | 0.5217076976431424 |
| 0.3348007899929355 | 0.4926153852942404  | 0.5182368099165825 |
| 0.1667700901655301 | 0.1730249175608640  | 0.4598402380420036 |
| 0.0026696147809384 | 0.3360704200284294  | 0.4866508170544337 |
| 0.9992415718529678 | -0.0005030933653495 | 0.4727001527799135 |
| 0.1686250295202259 | 0.3351837093034202  | 0.4971491499413150 |
| 0.5167224990921957 | 0.1724004847531871  | 0.4688300565599445 |
| 0.8311090740724919 | 0.3326818351364138  | 0.5359052183731660 |
| 0.6636647211780159 | 0.4949448210149514  | 0.5202335242205854 |
| 0.8311874002622801 | 0.4999105642733633  | 0.5286931988006704 |
| 0.6636215412623790 | 0.1686821741309009  | 0.5318427689497819 |
| 0.5153080029205541 | 0.3368748254829322  | 0.4654973074159134 |
| 0.5020113173693406 | 0.0026753858977382  | 0.5026798775918684 |
| 0.6720488220330785 | 0.3348241598212288  | 0.5043941913633903 |
| 0.0086364260886193 | 0.6679932610388910  | 0.4788590122533549 |
| 0.3336496649354472 | 0.8349932377817889  | 0.5250476897632124 |
| 0.1661987825303638 | 0.9989356232555570  | 0.5020873235743966 |
| 0.3329524711552733 | 0.0018866119265181  | 0.5115219553057403 |
| 0.1663429842377205 | 0.6681015102399959  | 0.5270018338838127 |
| 0.0092891256371980 | 0.8336290418295684  | 0.4690408996369387 |
| 0.9973582979437839 | 0.4984744279944533  | 0.5121001524982891 |
| 0.1675731019463860 | 0.8332732972772509  | 0.5111453869535187 |
| 0.5065382882460370 | 0.6655055240945521  | 0.5159576418093887 |
| 0.8278820652055805 | 0.8301608536824189  | 0.4654267084912987 |
| 0.6597090764260601 | 0.9930091847711267  | 0.4702950754739039 |

|                    |                    |                    |
|--------------------|--------------------|--------------------|
| 0.8258095120642396 | 0.9943770021015587 | 0.4615517781364532 |
| 0.6620719037604880 | 0.6663120240738980 | 0.4643737015157549 |
| 0.5040170936916317 | 0.8331455262699532 | 0.5173913539613497 |
| 0.5022972213999515 | 0.4969323253631202 | 0.4878090715515328 |
| 0.6665634457617288 | 0.8316804827291960 | 0.4954440686811633 |
| 0.2944437730428701 | 0.6980098098410025 | 0.7269306827222983 |
| 0.5161665831067863 | 0.6131165853405824 | 0.6865891332753157 |

\*COCO , Energy without entropy=-532.88 eV

1.0000000000000000

|                     |                     |                     |
|---------------------|---------------------|---------------------|
| 14.2659997940000007 | 0.0000000000000000  | 0.0000000000000000  |
| -7.1329998970000004 | 12.3547182319999997 | 0.0000000000000000  |
| 0.0000000000000000  | 0.0000000000000000  | 18.0000000000000000 |

|   |    |    |   |
|---|----|----|---|
| B | C  | N  | O |
| 4 | 26 | 32 | 2 |

Direct

|                    |                    |                    |
|--------------------|--------------------|--------------------|
| 0.4040808590823353 | 0.6013663853341512 | 0.5567437092191283 |
| 0.2223762737953671 | 0.6088876328179408 | 0.5480800372880954 |
| 0.3951189166862620 | 0.7817562039125896 | 0.5478222178514943 |
| 0.3387831072306457 | 0.6664809525193313 | 0.5899004578391174 |
| 0.0523209106143872 | 0.2748920850827159 | 0.4897561908410766 |
| 0.2241351493563646 | 0.2756315624205234 | 0.4748585891057790 |
| 0.2246987329438085 | 0.4405526993430948 | 0.5144253297634108 |
| 0.0539081252116954 | 0.4365245276059243 | 0.5054729793411975 |
| 0.0585935463140418 | 0.1171742567625037 | 0.4738463843677133 |
| 0.5665395597395040 | 0.2804523695086930 | 0.4782173726707868 |
| 0.7254844834053151 | 0.2770469445479803 | 0.5250671745904418 |
| 0.7253946945779663 | 0.4470782753529575 | 0.5191759498777027 |
| 0.5658159163051836 | 0.4390018317111050 | 0.4914161578060822 |
| 0.5669145050052827 | 0.1236088418934523 | 0.4995460552385976 |
| 0.8813497221380466 | 0.4402897353541335 | 0.5251632627568504 |
| 0.0572641933175205 | 0.7765612866232097 | 0.4829872313869906 |
| 0.2237496785338804 | 0.7795904324611130 | 0.5193733995411717 |
| 0.2248564810744207 | 0.9505097354389654 | 0.5062040906770162 |
| 0.0602177955992127 | 0.9405103525367168 | 0.4812514550576675 |
| 0.0551201371674388 | 0.6143708487125243 | 0.5019482463562865 |
| 0.3879888819462748 | 0.9505511421044193 | 0.5091347491507598 |
| 0.5600093699180165 | 0.7765565632383067 | 0.5082756628498963 |
| 0.7243811720613091 | 0.7743487101893550 | 0.4738109477081380 |
| 0.7229812967305640 | 0.9460426192874708 | 0.4727411545157215 |
| 0.5626907546723779 | 0.9458830330426551 | 0.4942487071490662 |
| 0.5639577443963927 | 0.6137844261965509 | 0.4871279767600477 |
| 0.8820031640283342 | 0.9399532372928181 | 0.4674169965701011 |
| 0.3863196374429605 | 0.4358944868048146 | 0.4891978902489839 |
| 0.3416172636415591 | 0.6275151256011455 | 0.6755633014109153 |

|                    |                    |                    |
|--------------------|--------------------|--------------------|
| 0.4357734704684204 | 0.6091500397348063 | 0.6468074443341330 |
| 0.0028388155715578 | 0.1697551504266200 | 0.4823590865408252 |
| 0.3329187063498637 | 0.3367383637790051 | 0.4658464687709731 |
| 0.1675975489778900 | 0.4952656500612528 | 0.5237702678227959 |
| 0.3352784604478125 | 0.4926813218702612 | 0.5181581817613379 |
| 0.1679516875137848 | 0.1723300281417836 | 0.4609173095984899 |
| 0.0033380048829328 | 0.3347952339581622 | 0.4879312713221010 |
| 0.9999454275741501 | 0.9989343577744737 | 0.4722035314364723 |
| 0.1695309212107280 | 0.3334729698184173 | 0.5007452286688101 |
| 0.5187673026766995 | 0.1729806658119078 | 0.4673364888235541 |
| 0.8320103612450153 | 0.3325338900327330 | 0.5356245545017284 |
| 0.6646435454791678 | 0.4947377741088749 | 0.5209386859723273 |
| 0.8323594075191988 | 0.4997061455643029 | 0.5283442829195437 |
| 0.6645043663206733 | 0.1686091363420494 | 0.5312328895174437 |
| 0.5171278645278345 | 0.3376026452573779 | 0.4650566200086274 |
| 0.5036614413059365 | 0.0032243490773317 | 0.5011253181490565 |
| 0.6727182318595548 | 0.3346955654949625 | 0.5052213190935131 |
| 0.0085750339238112 | 0.6664556862968952 | 0.4778309538165957 |
| 0.3358263512669195 | 0.8361475200263110 | 0.5229893105097525 |
| 0.1672318584583112 | 0.9979741720456028 | 0.4995332701158366 |
| 0.3347759557551236 | 0.0026016805555302 | 0.5083272161324969 |
| 0.1669372447985678 | 0.6670937344179892 | 0.5248042078564659 |
| 0.0097613154480512 | 0.8325153913433763 | 0.4686537113310929 |
| 0.9979348255128010 | 0.4976907791100784 | 0.5115016298720834 |
| 0.1699144454929670 | 0.8322413629709807 | 0.5069454903838009 |
| 0.5069382049722492 | 0.6660518843014666 | 0.5110507850111667 |
| 0.8287768163458674 | 0.8297996932808771 | 0.4653369614271567 |
| 0.6616264262878587 | 0.9939272929449180 | 0.4693469525136671 |
| 0.8271021427356563 | 0.9944233473871974 | 0.4600610301222976 |
| 0.6640976485897738 | 0.6654638385955925 | 0.4651418657071995 |
| 0.5066343343474903 | 0.8345924938661883 | 0.5184472534085797 |
| 0.5035972003029801 | 0.4969760870123724 | 0.4884055890250236 |
| 0.6665813826371890 | 0.8311928512752907 | 0.4932827649211199 |
| 0.2948109340656124 | 0.6147643428799825 | 0.7335511909734069 |
| 0.5274001581910956 | 0.6553382297378902 | 0.6728070296902763 |

\*COCHO , Energy without entropy=-536.86 eV

1.0000000000000000

14.2659997940000007 0.0000000000000000 0.0000000000000000

-7.1329998970000004 12.3547182319999997 0.0000000000000000

0.0000000000000000 0.0000000000000000 18.0000000000000000

B C N O H

4 26 32 2 1

Direct

|                    |                    |                    |
|--------------------|--------------------|--------------------|
| 0.3965594564918137 | 0.6020743654240737 | 0.5381500986729826 |
|--------------------|--------------------|--------------------|

|                    |                     |                    |
|--------------------|---------------------|--------------------|
| 0.2205797233972469 | 0.6020279181778889  | 0.5471383282061250 |
| 0.3951006383300664 | 0.7732768519122696  | 0.5435022040030728 |
| 0.3391472257862853 | 0.6564656694637075  | 0.5881380774497335 |
| 0.0518650598149235 | 0.2688215502768242  | 0.4914276512647416 |
| 0.2222601032190459 | 0.2708782253339352  | 0.4707651655492882 |
| 0.2227392057709621 | 0.4355955371398413  | 0.5086556209515990 |
| 0.0516388585920604 | 0.4303563895541648  | 0.5043837030592335 |
| 0.0583558637755786 | 0.1114210303263876  | 0.4745698885616199 |
| 0.5637119239796939 | 0.2736491271926779  | 0.4726325984414588 |
| 0.7227066205368702 | 0.2713367344017453  | 0.5216156427301086 |
| 0.7230621464662897 | 0.4415590832756932  | 0.5122648546736326 |
| 0.5637917858054657 | 0.4331186863381437  | 0.4827847082125389 |
| 0.5643595474513250 | 0.1174073702867940  | 0.4970369273415531 |
| 0.8783893026620581 | 0.4343014457376679  | 0.5215879241696310 |
| 0.0569920075329855 | 0.7709495110194007  | 0.4838449734838825 |
| 0.2229890035886958 | 0.7727607214642509  | 0.5191364734536225 |
| 0.2245049550530185 | 0.9439539040993691  | 0.5074943057578580 |
| 0.0607623300868967 | 0.9352194945297966  | 0.4823396060299977 |
| 0.0543612353324157 | 0.6084710671942849  | 0.5014461616265993 |
| 0.3872437148783274 | 0.9431506291851820  | 0.5092364053876530 |
| 0.5614438616031536 | 0.7727547870740470  | 0.5065478016466165 |
| 0.7237456448239881 | 0.7697617828858297  | 0.4696576330976613 |
| 0.7235707927106455 | 0.9409884194030290  | 0.4721854746478066 |
| 0.5625071095827137 | 0.9407203636501751  | 0.4926116285089118 |
| 0.5620595907236876 | 0.6085893924449346  | 0.4791499178045732 |
| 0.8821022690412436 | 0.9342068386301279  | 0.4665148838125069 |
| 0.3855685878789666 | 0.4324916272144066  | 0.4797759121891884 |
| 0.3481140281276080 | 0.6640970327198401  | 0.6767254193399002 |
| 0.4522323033053806 | 0.6751568501929421  | 0.7117359463042275 |
| 0.0025186581694546 | 0.1634690181690635  | 0.4868554756989779 |
| 0.3308922328081271 | 0.3321238623641156  | 0.4598791760768166 |
| 0.1657908624313834 | 0.4902839749646326  | 0.5196373499704261 |
| 0.3352823393167696 | 0.4913544381279156  | 0.5081598165518481 |
| 0.1661687510535404 | 0.1665937674894993  | 0.4588929872575015 |
| 0.0009239023694330 | 0.3278979307681791  | 0.4898512248705224 |
| 0.0003806944006533 | 0.9932191169765229  | 0.4729413307855312 |
| 0.1684423100273680 | 0.3286532458960859  | 0.4963138262647035 |
| 0.5158386723973780 | 0.1659265910319254  | 0.4637585887080860 |
| 0.8290984592380792 | 0.3270187394097660  | 0.5330405234683014 |
| 0.6630013442254760 | 0.4897823048606351  | 0.5118878330936795 |
| 0.8298296703484126 | 0.4940580056953960  | 0.5226096466549607 |
| 0.6620411268876965 | 0.1633889359437550  | 0.5288469906901371 |
| 0.5145241165974375 | 0.3307992600261432  | 0.4582097788920189 |
| 0.5026837466196099 | -0.0029424124711970 | 0.4997340393827105 |



|                    |                     |                    |
|--------------------|---------------------|--------------------|
| 0.6705356126037815 | 0.3288262378313793  | 0.4992799402430693 |
| 0.0081527499043729 | 0.6613817083746290  | 0.4777330992432444 |
| 0.3350982400259146 | 0.8282313096363341  | 0.5214254340501375 |
| 0.1676584193517697 | 0.9926429255680008  | 0.5008131282973014 |
| 0.3343043747988343 | -0.0045115548426273 | 0.5098356952291476 |
| 0.1657004779404241 | 0.6608121025399970  | 0.5243520224297886 |
| 0.0095938966100811 | 0.8271889614815834  | 0.4696330109194294 |
| 0.9962378475691205 | 0.4917552247963858  | 0.5096469893458270 |
| 0.1692886421745712 | 0.8265470693034799  | 0.5077818946080720 |
| 0.5061799729244473 | 0.6609445465387714  | 0.5071825238541401 |
| 0.8286766081153438 | 0.8247632315340191  | 0.4616993539080380 |
| 0.6618208672434938 | 0.9891100818190508  | 0.4683690702641963 |
| 0.8279289827204118 | 0.9897048306215911  | 0.4603194600429161 |
| 0.6623760822606602 | 0.6615656757620194  | 0.4578890790461601 |
| 0.5066568963662302 | 0.8294049485561209  | 0.5157884564381576 |
| 0.5020581501377132 | 0.4921459196706066  | 0.4787592303370645 |
| 0.6677896356456784 | 0.8267061959232170  | 0.4918516414970321 |
| 0.2818155625049982 | 0.6629294423951847  | 0.7214751563373344 |
| 0.5284688649977775 | 0.6829871849197848  | 0.6757920886801303 |
| 0.4510764428641292 | 0.6730145947685708  | 0.7739980814842808 |

\*COHCHO , Energy without entropy=-541.23 eV

1.0000000000000000

|                     |                     |                     |
|---------------------|---------------------|---------------------|
| 14.2659997940000007 | 0.0000000000000000  | 0.0000000000000000  |
| -7.1329998970000004 | 12.3547182319999997 | 0.0000000000000000  |
| 0.0000000000000000  | 0.0000000000000000  | 18.0000000000000000 |

|   |    |    |   |   |
|---|----|----|---|---|
| B | C  | N  | O | H |
| 4 | 26 | 32 | 2 | 2 |

Direct

|                    |                    |                    |
|--------------------|--------------------|--------------------|
| 0.3931245537234133 | 0.5907454526064431 | 0.5468889353774469 |
| 0.2157711241697982 | 0.5915859237945502 | 0.5504393410823329 |
| 0.3931490754486606 | 0.7695161544941752 | 0.5517327422276722 |
| 0.3306449851132643 | 0.6406768460989627 | 0.5922493782537082 |
| 0.0480118797633211 | 0.2588901059514278 | 0.4896600994881997 |
| 0.2200491402709544 | 0.2599272276955941 | 0.4749139365182656 |
| 0.2193873567555224 | 0.4249897214489279 | 0.5122947332450821 |
| 0.0489326399628076 | 0.4208425631000039 | 0.5032299634807020 |
| 0.0546434937262124 | 0.1010273869493684 | 0.4747986901000352 |
| 0.5611462285830620 | 0.2632209778362231 | 0.4794233305306124 |
| 0.7206673007685849 | 0.2596374802132270 | 0.5249396886205615 |
| 0.7205328322714772 | 0.4300860515119991 | 0.5204016978442164 |
| 0.5610285855362133 | 0.4221845072769740 | 0.4924827926302965 |
| 0.5617392018916785 | 0.1061024676285788 | 0.4998990686722197 |
| 0.8763091710138154 | 0.4232212044874757 | 0.5250290641986499 |
| 0.0514316615173784 | 0.7593987128501865 | 0.4841330343557679 |

|                     |                    |                    |
|---------------------|--------------------|--------------------|
| 0.2187081488249459  | 0.7624533884493836 | 0.5204640371365338 |
| 0.2203587069485367  | 0.9337924174343653 | 0.5081768954318927 |
| 0.0564221049618739  | 0.9243424743407178 | 0.4823275372100756 |
| 0.0498039049861153  | 0.5980018553304975 | 0.5030502032891337 |
| 0.3824353737137554  | 0.9325890558972185 | 0.5098921869723089 |
| 0.5573217847769613  | 0.7620480825766192 | 0.5122916564155884 |
| 0.7204673452528088  | 0.7582892881110833 | 0.4775868694604053 |
| 0.7184430286282812  | 0.9293812864773900 | 0.4729264740645074 |
| 0.5573811016807921  | 0.9283038324179116 | 0.4936150107906838 |
| 0.5597129958188372  | 0.5973207634365629 | 0.4897793365321428 |
| 0.8777940937201504  | 0.9234399328526839 | 0.4688400582754216 |
| 0.3829493845274740  | 0.4214588402069107 | 0.4873156896170104 |
| 0.3801644575727087  | 0.7466346364030725 | 0.6411397230133663 |
| 0.4831552870806423  | 0.7862830024299113 | 0.6803137676042831 |
| -0.0012151717374721 | 0.1540129271466757 | 0.4829773501476827 |
| 0.3287037996171671  | 0.3215812247961360 | 0.4659636525136607 |
| 0.1630297250930520  | 0.4801974158295225 | 0.5202594441982212 |
| 0.3314912984126098  | 0.4803258541856094 | 0.5143265550646302 |
| 0.1635659993426910  | 0.1563352669022491 | 0.4618394767168631 |
| -0.0011844581388529 | 0.3191013217624184 | 0.4861027383960842 |
| -0.0040847735131050 | 0.9827149836668517 | 0.4732907237005436 |
| 0.1652327173778136  | 0.3180455759139628 | 0.5008314709939794 |
| 0.5133614984245142  | 0.1558910464315108 | 0.4684590180053881 |
| 0.8274635441255218  | 0.3153679549583904 | 0.5344057249732411 |
| 0.6601819161930609  | 0.4780705634094392 | 0.5218227943585770 |
| 0.8275273768692106  | 0.4827652413002958 | 0.5298051023616299 |
| 0.6599817570465413  | 0.1512416550694066 | 0.5308714009642083 |
| 0.5118214935910637  | 0.3205801841520082 | 0.4665641541403202 |
| 0.4984318927811199  | 0.9854832132448891 | 0.5011076756522808 |
| 0.6677536198816098  | 0.3176168628602664 | 0.5061811467973738 |
| 0.0036312950524073  | 0.6506098003852109 | 0.4779118808099351 |
| 0.3290226459667352  | 0.8171714156150486 | 0.5196639063934988 |
| 0.1632792964443737  | 0.9819844616533552 | 0.5009652745037035 |
| 0.3297030322101580  | 0.9853095497503511 | 0.5103979441921088 |
| 0.1607486331873864  | 0.6509288547786207 | 0.5274844795935871 |
| 0.0056430292519314  | 0.8165780165176125 | 0.4684206514994590 |
| 0.9928879452757676  | 0.4813251575368819 | 0.5108016889582556 |
| 0.1640815434529273  | 0.8156923770870701 | 0.5107972696697168 |
| 0.5041950291314866  | 0.6502115382233254 | 0.5175619026023870 |
| 0.8252556700078688  | 0.8139268374670400 | 0.4690699530717719 |
| 0.6563562865763258  | 0.9765220814484944 | 0.4678398442353554 |
| 0.8223537634998835  | 0.9778694325946494 | 0.4593838534973344 |
| 0.6600795250323429  | 0.6499945053525822 | 0.4686247053665452 |
| 0.5023388120050071  | 0.8174882927047790 | 0.5165425089205512 |

|                    |                    |                    |
|--------------------|--------------------|--------------------|
| 0.4994526019090103 | 0.4809002302067276 | 0.4890554019774540 |
| 0.6633419117635546 | 0.8158400012160699 | 0.4960666122362705 |
| 0.3092139036568017 | 0.7776159374458465 | 0.6752617452023527 |
| 0.5582434433303392 | 0.7726324532054852 | 0.6599672465693883 |
| 0.4905022081741552 | 0.8341371614683109 | 0.7312928554471844 |
| 0.2509401226949014 | 0.7131489894044544 | 0.6984359458293338 |

\*COHCH<sub>2</sub>O , Energy without entropy=-545.06 eV

1.0000000000000000

|                     |                     |                     |
|---------------------|---------------------|---------------------|
| 14.2659997940000007 | 0.0000000000000000  | 0.0000000000000000  |
| -7.1329998970000004 | 12.3547182319999997 | 0.0000000000000000  |
| 0.0000000000000000  | 0.0000000000000000  | 18.0000000000000000 |

|   |    |    |   |   |
|---|----|----|---|---|
| B | C  | N  | O | H |
| 4 | 26 | 32 | 2 | 3 |

Direct

|                    |                    |                    |
|--------------------|--------------------|--------------------|
| 0.4031897083206109 | 0.5845494992102381 | 0.5635448495211792 |
| 0.2208733808546977 | 0.5987767016607660 | 0.5410994244066228 |
| 0.3864266700141502 | 0.7623356723954248 | 0.5380403768883066 |
| 0.3370102382907260 | 0.6504060363615950 | 0.5878139273447812 |
| 0.0495659973959166 | 0.2625935959022325 | 0.4869101818739837 |
| 0.2207190008021994 | 0.2623819484973107 | 0.4720808981768523 |
| 0.2227123526505526 | 0.4286866954189074 | 0.5089987846517414 |
| 0.0517042916375820 | 0.4247640843775096 | 0.5023237175247747 |
| 0.0544505016158281 | 0.1041219602334355 | 0.4719641365368806 |
| 0.5628582409877999 | 0.2656888415626383 | 0.4753411726842329 |
| 0.7217336566553637 | 0.2616930176355498 | 0.5226660360568436 |
| 0.7213073858733838 | 0.4319324358614368 | 0.5181880185773128 |
| 0.5619430841900540 | 0.4239114730495283 | 0.4898380402138313 |
| 0.5626114098236519 | 0.1083830436304827 | 0.4967006788779922 |
| 0.8773801438945965 | 0.4256511155082171 | 0.5238304073932569 |
| 0.0530194784757825 | 0.7635512467101032 | 0.4808905345808187 |
| 0.2182565942778288 | 0.7658318703482107 | 0.5160383019490334 |
| 0.2196524260230271 | 0.9360149447116024 | 0.5056467942493816 |
| 0.0562895841145050 | 0.9273920386116123 | 0.4798393432328680 |
| 0.0504543810326372 | 0.6007757930886150 | 0.4997727822478081 |
| 0.3830163714563930 | 0.9354845729832425 | 0.5065279516469111 |
| 0.5549986100491958 | 0.7606193833711375 | 0.5046106547621892 |
| 0.7202647090401383 | 0.7596071336055297 | 0.4729024650741619 |
| 0.7172266591792955 | 0.9303799247377745 | 0.4676756921366352 |
| 0.5555274678863557 | 0.9285405436379496 | 0.4885849643628418 |
| 0.5607289729867868 | 0.5987849030374889 | 0.4871550844322810 |
| 0.8771881727745895 | 0.9259786542450612 | 0.4653584781162209 |
| 0.3831025981061689 | 0.4220664063475009 | 0.4871722556195779 |
| 0.3314969944149976 | 0.6330514074771550 | 0.6703692977529816 |
| 0.3941875218291396 | 0.5788095002470099 | 0.6954907474738612 |

|                    |                    |                    |
|--------------------|--------------------|--------------------|
| 0.9990505758060605 | 0.1566668118831441 | 0.4813451296009004 |
| 0.3299629558340014 | 0.3222706134271170 | 0.4641635003577317 |
| 0.1668133789467524 | 0.4846238543362699 | 0.5176714403085759 |
| 0.3332943583798726 | 0.4799411430920359 | 0.5137652107355510 |
| 0.1640785178017692 | 0.1587688615441708 | 0.4590979412308527 |
| 0.0007147076987529 | 0.3223837511568340 | 0.4863129192466019 |
| 0.9957689480853611 | 0.9858683369689467 | 0.4707006707179337 |
| 0.1665767596879991 | 0.3214256574182960 | 0.4949975427367784 |
| 0.5146340502237605 | 0.1581869647970711 | 0.4647271574837499 |
| 0.8282364688016909 | 0.3176311547961311 | 0.5337350322877340 |
| 0.6601935498398454 | 0.4789483780951788 | 0.5206607763672100 |
| 0.8281254617521877 | 0.4848530058054202 | 0.5282963152040229 |
| 0.6605421276057801 | 0.1531269545916194 | 0.5283343924873524 |
| 0.5139609681493370 | 0.3231528120128166 | 0.4621763998126370 |
| 0.4982436779357385 | 0.9872939872792323 | 0.4975901280763453 |
| 0.6693874195416571 | 0.3197986977982469 | 0.5023678511092728 |
| 0.0037818384852864 | 0.6532742111926162 | 0.4759779459728718 |
| 0.3298578726724970 | 0.8203995030861995 | 0.5186155688657677 |
| 0.1622846104611079 | 0.9845584979787430 | 0.4999120570101084 |
| 0.3296654516547899 | 0.9876443948874187 | 0.5078122075598901 |
| 0.1621567420730189 | 0.6538210398688769 | 0.5215454397219568 |
| 0.0055451404585184 | 0.8197016450041109 | 0.4658900920592975 |
| 0.9943695071146553 | 0.4843690928189499 | 0.5097445717526952 |
| 0.1642037734336804 | 0.8192655557465773 | 0.5049142699460070 |
| 0.5052363136771874 | 0.6506835596042997 | 0.5131726567571763 |
| 0.8249090367497076 | 0.8157179934973486 | 0.4660376962866363 |
| 0.6554237537227813 | 0.9773531444145983 | 0.4646260552320861 |
| 0.8223157072547168 | 0.9797624165340176 | 0.4557648736308573 |
| 0.6607344251192858 | 0.6504679027944356 | 0.4638645012200519 |
| 0.4985538864318431 | 0.8158015195876699 | 0.5104277632619942 |
| 0.5002910321775935 | 0.4820799897247617 | 0.4869173547271672 |
| 0.6616793578060868 | 0.8162746556494995 | 0.4890284079381844 |
| 0.2753389614821435 | 0.6526293067792616 | 0.7212003747659409 |
| 0.4356003215612876 | 0.5525972220052567 | 0.6329783272319744 |
| 0.4607867049180313 | 0.6354125308647702 | 0.7328306496822755 |
| 0.2798298299088786 | 0.6251749350077455 | 0.7703058729490428 |
| 0.3416952410923812 | 0.5057755854850551 | 0.7294750092986240 |

\*CHOHCH<sub>2</sub>O , Energy without entropy=-549.30 eV

1.0000000000000000

14.2659997940000007 0.0000000000000000 0.0000000000000000

-7.1329998970000004 12.3547182319999997 0.0000000000000000

0.0000000000000000 0.0000000000000000 18.0000000000000000

B C N O H

4 26 32 2 4

Direct

|                     |                    |                    |
|---------------------|--------------------|--------------------|
| 0.4017923209491429  | 0.5867007112153687 | 0.5628135397684955 |
| 0.2182117069299309  | 0.5944407675638683 | 0.5488180250933326 |
| 0.3904550775485407  | 0.7655064663669616 | 0.5415492661401041 |
| 0.3365169246564025  | 0.6531696201492736 | 0.5885056424612509 |
| 0.0489250383440675  | 0.2612784855491994 | 0.4864381529203275 |
| 0.2204522806331113  | 0.2620624739386476 | 0.4723150026988935 |
| 0.2212815219320194  | 0.4276019640038625 | 0.5102197140149139 |
| 0.0500576885440557  | 0.4224282749204837 | 0.5027763860916844 |
| 0.0550542057981412  | 0.1032305543729130 | 0.4716330182608894 |
| 0.5622456999984602  | 0.2663411180115016 | 0.4748865051906742 |
| 0.7206387173449686  | 0.2623297936676692 | 0.5219831318942921 |
| 0.7203664773706590  | 0.4320929989197449 | 0.5174372859907764 |
| 0.5610897059155360  | 0.4247743743504322 | 0.4890159900167206 |
| 0.5624889271911341  | 0.1089108957279436 | 0.4948685372212486 |
| 0.8767780880843252  | 0.4257544456650169 | 0.5228767725346950 |
| 0.0537315900959612  | 0.7622667647369141 | 0.4796205109378289 |
| 0.2194945698966422  | 0.7642827155974531 | 0.5158812695857039 |
| 0.2210358994439375  | 0.9352813864984122 | 0.5029573094247553 |
| 0.0570013480520799  | 0.9262807078295284 | 0.4784347894096134 |
| 0.0511917576018386  | 0.6000521993186383 | 0.4996847311060036 |
| 0.3836581618531514  | 0.9348238613752995 | 0.5040493547542252 |
| 0.5556442308012803  | 0.7619451276382192 | 0.5031668746574627 |
| 0.7207481227757744  | 0.7599573051362694 | 0.4724388823206289 |
| 0.7189597860687135  | 0.9312612216604964 | 0.4673298588699680 |
| 0.5586181279971124  | 0.9311024664639397 | 0.4882281464519476 |
| 0.5601779743205316  | 0.5998990030310410 | 0.4862799853691682 |
| 0.8784566219189978  | 0.9256772964769687 | 0.4657946777742418 |
| 0.3818537166433397  | 0.4225432078455094 | 0.4870206444650511 |
| 0.3544926070949236  | 0.6558934925412951 | 0.6794803111243214 |
| 0.3953711008414661  | 0.5749968284925010 | 0.6945627204466873 |
| 0.9992638722510836  | 0.1558660257689812 | 0.4801401967323394 |
| 0.3295719844335616  | 0.3225860536491035 | 0.4645507837406538 |
| 0.1632398472282148  | 0.4814759431105818 | 0.5208958406523871 |
| 0.3315482422226118  | 0.4799438419115841 | 0.5134501309140022 |
| 0.1646910421438373  | 0.1584096436713693 | 0.4594712818677330 |
| -0.0009977800567785 | 0.3206622616775390 | 0.4852918839039128 |
| 0.9966914712372356  | 0.9850833116534028 | 0.4701696517696179 |
| 0.1657924938449241  | 0.3207504458749205 | 0.4950856073603624 |
| 0.5147078395303212  | 0.1589397489047219 | 0.4630255625954918 |
| 0.8271093147901845  | 0.3177973676003814 | 0.5328371762018559 |
| 0.6593778051750542  | 0.4794919159696863 | 0.5195788694234423 |
| 0.8275221560057066  | 0.4849425396176915 | 0.5267080311653412 |
| 0.6596462212679738  | 0.1536057604218705 | 0.5271788782266610 |

|                    |                    |                    |
|--------------------|--------------------|--------------------|
| 0.5132594425325930 | 0.3238996240385155 | 0.4615743399356679 |
| 0.4994802922145504 | 0.9883454736781891 | 0.4953681410378932 |
| 0.6678748811601442 | 0.3200220787830329 | 0.5027814944860676 |
| 0.0046176762041982 | 0.6518644827569187 | 0.4747155070111188 |
| 0.3316882649860787 | 0.8206050493581423 | 0.5169351905442963 |
| 0.1637247781466311 | 0.9832773894768724 | 0.4972232821369740 |
| 0.3309428954437991 | 0.9874523843799828 | 0.5049226636172599 |
| 0.1620724938742725 | 0.6518391189011956 | 0.5230944012283559 |
| 0.0063985990045211 | 0.8183952007038899 | 0.4649114268341044 |
| 0.9933163351581666 | 0.4831210419417490 | 0.5090041377319456 |
| 0.1658283084925636 | 0.8174170997085066 | 0.5033166751529160 |
| 0.5039166120022049 | 0.6520271838632988 | 0.5102121365778033 |
| 0.8254134450990044 | 0.8152851669219934 | 0.4669265294013180 |
| 0.6579394616430123 | 0.9797532042985451 | 0.4640355850962450 |
| 0.8236913781405637 | 0.9797513196313024 | 0.4563753390134320 |
| 0.6605374291084711 | 0.6504951717972924 | 0.4643790885820767 |
| 0.5018296619522947 | 0.8199994401398084 | 0.5117541589992568 |
| 0.4993650074501437 | 0.4829607234576861 | 0.4859246559058311 |
| 0.6614640603939667 | 0.8164238047945080 | 0.4865746307902067 |
| 0.2558840790576914 | 0.6263921071156513 | 0.7203426021515621 |
| 0.4400304346857595 | 0.5571938302596283 | 0.6284378451710316 |
| 0.4590038206487972 | 0.6046321019471144 | 0.7377165155894349 |
| 0.2752615655193330 | 0.6469019477246962 | 0.7721275117495956 |
| 0.3257930710108953 | 0.4981402375251616 | 0.7142176391737702 |
| 0.4172415033501607 | 0.7374033758991217 | 0.6979673775321331 |

\*CHCH<sub>2</sub>O , Energy without entropy=-538.46 eV

1.0000000000000000

|                     |                     |                     |
|---------------------|---------------------|---------------------|
| 14.2659997940000007 | 0.0000000000000000  | 0.0000000000000000  |
| -7.1329998970000004 | 12.3547182319999997 | 0.0000000000000000  |
| 0.0000000000000000  | 0.0000000000000000  | 18.0000000000000000 |

| B | C  | N  | O | H |
|---|----|----|---|---|
| 4 | 26 | 32 | 1 | 3 |

Direct

|                    |                    |                    |
|--------------------|--------------------|--------------------|
| 0.3919728187456721 | 0.5728904030349504 | 0.5677001640111056 |
| 0.2109388145808141 | 0.5858944231788472 | 0.5442897751388458 |
| 0.3882520936311769 | 0.7618793096173980 | 0.5581387867016666 |
| 0.3177465753436006 | 0.6285762059495384 | 0.5889571739983912 |
| 0.0448582395297519 | 0.2539366887572928 | 0.4783534267246394 |
| 0.2155758639683961 | 0.2515982824949980 | 0.4736130516956656 |
| 0.2157660930075528 | 0.4162856375829283 | 0.5133602018914022 |
| 0.0479068239436403 | 0.4157797920389333 | 0.4946379016267579 |
| 0.0491965793704085 | 0.0945088170368720 | 0.4687048310743308 |
| 0.5559399509322834 | 0.2558229791309545 | 0.4842261137061115 |
| 0.7186735001314379 | 0.2537342825990928 | 0.5234634972512094 |

|                     |                    |                    |
|---------------------|--------------------|--------------------|
| 0.7183033257380816  | 0.4240258636789540 | 0.5173600045586499 |
| 0.5568583206444045  | 0.4156479986208411 | 0.4953265188988358 |
| 0.5573395717908636  | 0.0994505813362489 | 0.5050744959794703 |
| 0.8747050086236651  | 0.4173060078780685 | 0.5181787970821453 |
| 0.0494543578563365  | 0.7550079919603119 | 0.4783662869219222 |
| 0.2143264570756171  | 0.7566167569309047 | 0.5199625107406703 |
| 0.2145725176583621  | 0.9277344761562912 | 0.5109067982511772 |
| 0.0515638815279096  | 0.9181513080187449 | 0.4811650376067415 |
| 0.0470897843948315  | 0.5931238855483628 | 0.4955782670355871 |
| 0.3769145916559898  | 0.9270315308566418 | 0.5171571199128333 |
| 0.5443369586282596  | 0.7500466260553554 | 0.5020027494809025 |
| 0.7121449842064648  | 0.7500964714762111 | 0.4744978309933922 |
| 0.7103895926794213  | 0.9209373789657186 | 0.4747072761844734 |
| 0.5500502390121182  | 0.9201272921721561 | 0.4971041904833608 |
| 0.5516197694639334  | 0.5895690198735755 | 0.4888024920302401 |
| 0.8703349297112551  | 0.9158105812709579 | 0.4698415803195219 |
| 0.3765100753633990  | 0.4097922758619904 | 0.4930948390714577 |
| 0.3938227946470305  | 0.7205371986043274 | 0.6415245337342308 |
| 0.4806617797736411  | 0.6907771890813077 | 0.6635879732865776 |
| 0.9947302762606541  | 0.1491434669331023 | 0.4684508185944015 |
| 0.3242260047645820  | 0.3130515963370532 | 0.4647013646297215 |
| 0.1606150574486330  | 0.4729205028243408 | 0.5148796965749722 |
| 0.3254770951049048  | 0.4627879422551858 | 0.5261616151053079 |
| 0.1593883834914437  | 0.1481722985296027 | 0.4596367192405451 |
| -0.0026649543482949 | 0.3149361636981396 | 0.4739697825643812 |
| 0.9899065646587617  | 0.9761730501746931 | 0.4716629942625344 |
| 0.1597535736810405  | 0.3091694412873986 | 0.4978761887077909 |
| 0.5069331291720034  | 0.1479431314590040 | 0.4752645629388842 |
| 0.8261762461320536  | 0.3095007410057772 | 0.5291855975221822 |
| 0.6584288229573476  | 0.4724954466070946 | 0.5203308361565889 |
| 0.8258603872290753  | 0.4767422885384573 | 0.5233468874736943 |
| 0.6574656848659147  | 0.1457084726815797 | 0.5330392975515998 |
| 0.5051637338129749  | 0.3118562652201604 | 0.4737558125936451 |
| 0.4928020729188837  | 0.9787671167664154 | 0.5077022775513310 |
| 0.6647468430628459  | 0.3110366392961755 | 0.5054804373201440 |
| 0.0008666193609963  | 0.6459329977206885 | 0.4705414244925012 |
| 0.3238626145331638  | 0.8130438887198600 | 0.5310023465341177 |
| 0.1557289834153708  | 0.9751199236069450 | 0.5052123617400104 |
| 0.3234287840163312  | 0.9798493812719581 | 0.5170132676728166 |
| 0.1560804918846108  | 0.6449984807292859 | 0.5217180471357573 |
| 0.0026554443703171  | 0.8118045450422052 | 0.4629399275342739 |
| 0.9908729159504430  | 0.4758720954854420 | 0.5023321229949333 |
| 0.1600048914944342  | 0.8103636056381925 | 0.5060854047102957 |
| 0.4921929470774020  | 0.6402654734291416 | 0.5074380701302461 |

|                    |                    |                    |
|--------------------|--------------------|--------------------|
| 0.8179540078781026 | 0.8055599435922092 | 0.4697723755088611 |
| 0.6513168333120923 | 0.9709044560034986 | 0.4751224217018635 |
| 0.8164058788492727 | 0.9711521512245712 | 0.4663371243240792 |
| 0.6536018102771818 | 0.6409082742883663 | 0.4693112039623440 |
| 0.4923720416685977 | 0.8079904938664935 | 0.5135772405809601 |
| 0.4939989392712756 | 0.4725629750699704 | 0.4917885150999302 |
| 0.6523075056534532 | 0.8055224203729978 | 0.4856059741056394 |
| 0.4533258263520229 | 0.5844925880873685 | 0.6351708016101802 |
| 0.5621551879106789 | 0.7500194395951763 | 0.6416459791345309 |
| 0.4880480492691028 | 0.6891661257296275 | 0.7243827205849028 |
| 0.3663549146060182 | 0.7540688511430668 | 0.6856936672617090 |

\*CH<sub>2</sub>OH , Energy without entropy=-542.03 eV

1.0000000000000000

14.2659997940000007 0.0000000000000000 0.0000000000000000

-7.1329998970000004 12.3547182319999997 0.0000000000000000

0.0000000000000000 0.0000000000000000 18.0000000000000000

| B | C  | N  | O | H |
|---|----|----|---|---|
| 4 | 26 | 32 | 1 | 4 |

Direct

|                    |                    |                    |
|--------------------|--------------------|--------------------|
| 0.3828237767021646 | 0.5716994257554825 | 0.5425067903960958 |
| 0.2089767134108587 | 0.5743919552821478 | 0.5494333483246854 |
| 0.3882904773917469 | 0.7561880392185563 | 0.5566601449121401 |
| 0.3223945273753845 | 0.6195482695825839 | 0.5918437890132245 |
| 0.0386879382339884 | 0.2408662750591886 | 0.4892352128192521 |
| 0.2111575775885489 | 0.2420649773277308 | 0.4712865912942560 |
| 0.2108056012028230 | 0.4080297293684622 | 0.5066799397445788 |
| 0.0402826567442988 | 0.4032702479264209 | 0.5035832788523764 |
| 0.0456792848075011 | 0.0834100730807682 | 0.4725428528219550 |
| 0.5533047361337285 | 0.2458293440290426 | 0.4778313921497190 |
| 0.7122633370458993 | 0.2429181952941514 | 0.5260635935031014 |
| 0.7119597192725460 | 0.4131089642227939 | 0.5191707198528296 |
| 0.5523756757676849 | 0.4044887646783102 | 0.4901430172364261 |
| 0.5538432595088958 | 0.0891562713308893 | 0.5004497782608581 |
| 0.8679113648284309 | 0.4065532977782308 | 0.5258808593106342 |
| 0.0445597994872993 | 0.7424491065742993 | 0.4820709580176956 |
| 0.2115900781240893 | 0.7455444406741957 | 0.5199261688399129 |
| 0.2127412896546269 | 0.9173784435388630 | 0.5081047840229205 |
| 0.0484621751460703 | 0.9069637658392503 | 0.4811347404778787 |
| 0.0424193628049466 | 0.5809631808009503 | 0.5027274814501932 |
| 0.3749866665886188 | 0.9164631828264221 | 0.5116922030661316 |
| 0.5483492837208747 | 0.7442220082485278 | 0.5108649431809148 |
| 0.7117118362604230 | 0.7404111316782773 | 0.4749337161763806 |
| 0.7103179011760052 | 0.9122586859949937 | 0.4723161259554894 |
| 0.5492086303547210 | 0.9110785265174732 | 0.4937815091456942 |



|                     |                    |                    |
|---------------------|--------------------|--------------------|
| 0.5504596320899642  | 0.5794647184835302 | 0.4869527630430799 |
| 0.8689766567200407  | 0.9053633121701349 | 0.4663990690446323 |
| 0.3741997074897916  | 0.4032812758827419 | 0.4835283657432449 |
| 0.3832065096286220  | 0.7251467671584253 | 0.6412090627987396 |
| 0.4859560517129656  | 0.7482975933926066 | 0.6816966986553642 |
| 0.9894159921306980  | 0.1356105001028816 | 0.4832263615176456 |
| 0.3196924038761263  | 0.3024990154695442 | 0.4634034389364886 |
| 0.1554871739239150  | 0.4633350845188023 | 0.5163485375533607 |
| 0.3223185994144969  | 0.4627320227124889 | 0.5079196192515693 |
| 0.1542393998885840  | 0.1382181942693459 | 0.4583793152827353 |
| 0.9890999995528632  | 0.3003858623327546 | 0.4887370824737058 |
| 0.9876877091796989  | 0.9651004014557181 | 0.4715939975878118 |
| 0.1563837208477272  | 0.3003838192987018 | 0.4964739277530618 |
| 0.5058387903794480  | 0.1383390640170190 | 0.4674760909589297 |
| 0.8187450677404603  | 0.2988894058996476 | 0.5369728599923032 |
| 0.6512536203385076  | 0.4607256410936509 | 0.5199341719566705 |
| 0.8188935061464574  | 0.4660468386544388 | 0.5288823693414546 |
| 0.6515462955397575  | 0.1345043678671490 | 0.5323837878934254 |
| 0.5040313276403035  | 0.3028990307409452 | 0.4640159001152224 |
| 0.4905353801265412  | 0.9685748094073425 | 0.5023448412479982 |
| 0.6596443038297869  | 0.3005127126051481 | 0.5053339163520026 |
| -0.0037965285726118 | 0.6334608314516459 | 0.4771678713394312 |
| 0.3216584833797118  | 0.8014831488446239 | 0.5240201899183531 |
| 0.1544799454955233  | 0.9648009062023976 | 0.5019432379914054 |
| 0.3217606103627887  | 0.9692327578512252 | 0.5123208524595581 |
| 0.1534877259158114  | 0.6342140952501503 | 0.5274084141789711 |
| -0.0019851699410306 | 0.7993293900848040 | 0.4667282708038074 |
| 0.9849018917276149  | 0.4642437231584824 | 0.5115222603522328 |
| 0.1575251632956773  | 0.7989828529305874 | 0.5068315232334911 |
| 0.4954258311222298  | 0.6326633268315101 | 0.5156026440260810 |
| 0.8163612676775782  | 0.7958558369316115 | 0.4645873602120578 |
| 0.6486882385640623  | 0.9593283935183624 | 0.4677696225656958 |
| 0.8141314389271872  | 0.9599881710616177 | 0.4573494000173116 |
| 0.6509238092607186  | 0.6326938816294274 | 0.4649067308126121 |
| 0.4942624645033410  | 0.8002050598362349 | 0.5163420299402642 |
| 0.4904873279265996  | 0.4629137156755950 | 0.4861561596629848 |
| 0.6569447397935434  | 0.7991332833874332 | 0.4983160261585577 |
| 0.4814427119016779  | 0.6486889917072048 | 0.7037426846323072 |
| 0.5590221021946091  | 0.7959009391445351 | 0.6470236775600082 |
| 0.4947887078629993  | 0.7980880782388986 | 0.7310805355106875 |
| 0.3291308154996222  | 0.7423709469580404 | 0.6742909163991205 |
| 0.5468028395734156  | 0.6675349841445735 | 0.7319233249002572 |

\*CH<sub>2</sub>CH<sub>2</sub>OH , Energy without entropy=-545.72 eV

1.0000000000000000

|                     |                     |                     |
|---------------------|---------------------|---------------------|
| 14.2659997940000007 | 0.0000000000000000  | 0.0000000000000000  |
| -7.1329998970000004 | 12.3547182319999997 | 0.0000000000000000  |
| 0.0000000000000000  | 0.0000000000000000  | 18.0000000000000000 |

|   |    |    |   |   |
|---|----|----|---|---|
| B | C  | N  | O | H |
| 4 | 26 | 32 | 1 | 5 |

Direct

|                    |                    |                    |
|--------------------|--------------------|--------------------|
| 0.3918458821752661 | 0.5794612396416982 | 0.5583911695450583 |
| 0.2124201300060743 | 0.5874373936253955 | 0.5502434248818137 |
| 0.3857733867241782 | 0.7593350354637572 | 0.5464369980136512 |
| 0.3305191486538675 | 0.6443767561901694 | 0.5926293204682233 |
| 0.0443534293657218 | 0.2552928169733334 | 0.4849744914887125 |
| 0.2155528933342092 | 0.2549663062017071 | 0.4751534566156017 |
| 0.2150699858712066 | 0.4200593443885610 | 0.5124502551326041 |
| 0.0455776590664853 | 0.4166608306637362 | 0.5015680410050933 |
| 0.0499054981694023 | 0.0965149939386218 | 0.4725745781698964 |
| 0.5584214271879372 | 0.2595591808216625 | 0.4776336890845038 |
| 0.7178775425828433 | 0.2556978941674168 | 0.5235119404677233 |
| 0.7170771028726244 | 0.4258152255628773 | 0.5209250890468934 |
| 0.5568552898077191 | 0.4171012123861474 | 0.4940464455957181 |
| 0.5584779169964538 | 0.1023079181615430 | 0.4985430860253920 |
| 0.8732025634805192 | 0.4194784428500539 | 0.5242570433906483 |
| 0.0500579186456584 | 0.7563682071879824 | 0.4800591236322871 |
| 0.2148392096588646 | 0.7581501214662428 | 0.5188801485209028 |
| 0.2158988844000378 | 0.9284011348574389 | 0.5057768556976283 |
| 0.0524089753274121 | 0.9198913417585254 | 0.4800044340869515 |
| 0.0473491097242395 | 0.5939885464928962 | 0.4997844582417286 |
| 0.3792780075940407 | 0.9287801490314375 | 0.5083648839030072 |
| 0.5516398658986580 | 0.7562458175122285 | 0.5106588875954537 |
| 0.7159416775910842 | 0.7528744899315784 | 0.4771279054725209 |
| 0.7138676685088744 | 0.9240416354313031 | 0.4718734239918139 |
| 0.5532756042290753 | 0.9239606722017505 | 0.4924501791097131 |
| 0.5551695181256209 | 0.5923438543155841 | 0.4906459248352201 |
| 0.8732240731289701 | 0.9184495312094620 | 0.4683207143854011 |
| 0.3777247300770709 | 0.4148711609636129 | 0.4905144494619274 |
| 0.3459610640301191 | 0.6438087286874085 | 0.6844688337563153 |
| 0.4425078037896832 | 0.6284712555044065 | 0.6953935046613681 |
| 0.9943739926577276 | 0.1499111547051458 | 0.4783417059203309 |
| 0.3250026077919614 | 0.3152626797745790 | 0.4682377835136748 |
| 0.1584360056487817 | 0.4751146013027371 | 0.5217830152502257 |
| 0.3268612456599235 | 0.4727434737695039 | 0.5170851323447431 |
| 0.1596354497226400 | 0.1514334066199540 | 0.4624452696332506 |
| 0.9953800096345372 | 0.3157364426263935 | 0.4820091262495454 |
| 0.9918009333520456 | 0.9783055627555258 | 0.4717991285468211 |
| 0.1605650974438444 | 0.3139845668951547 | 0.4969311199020741 |

|                    |                    |                    |
|--------------------|--------------------|--------------------|
| 0.5101639264160555 | 0.1522851052567542 | 0.4671461644633173 |
| 0.8245329876729818 | 0.3116071175310407 | 0.5339595184301895 |
| 0.6551834897578145 | 0.4721041282720574 | 0.5253847998155533 |
| 0.8240671972653532 | 0.4788397912814710 | 0.5302321888182493 |
| 0.6571157122257716 | 0.1474335911227578 | 0.5293258908464405 |
| 0.5093398131645598 | 0.3172114123283482 | 0.4653565829856604 |
| 0.4950513773602662 | 0.9819458764060527 | 0.5000068765373864 |
| 0.6654796491883039 | 0.3140584925855595 | 0.5039621680820626 |
| 0.0012399449335385 | 0.6459634384289389 | 0.4742029191863454 |
| 0.3272701012335037 | 0.8144474207675582 | 0.5221779508679373 |
| 0.1585538462240171 | 0.9766350036491516 | 0.4997720745773718 |
| 0.3260041022867101 | 0.9808290842288662 | 0.5082344494570730 |
| 0.1572745006662070 | 0.6455111759978084 | 0.5250170235626134 |
| 0.0023261805138420 | 0.8122636136474443 | 0.4651145771504947 |
| 0.9894808717798429 | 0.4771989271570861 | 0.5090656957943970 |
| 0.1610373623272095 | 0.8113285692239307 | 0.5054063154112128 |
| 0.4992636349161058 | 0.6449256352222342 | 0.5173579346056169 |
| 0.8205786796887126 | 0.8085068008225810 | 0.4692093080866385 |
| 0.6523349708664489 | 0.9716051037949327 | 0.4670897064829739 |
| 0.8181130996558232 | 0.9723831585013952 | 0.4589704611162944 |
| 0.6555680345269433 | 0.6440289653932927 | 0.4684053567069666 |
| 0.4972200241615465 | 0.8132816330858136 | 0.5173846201427542 |
| 0.4949121223761501 | 0.4754246427709997 | 0.4921591702885929 |
| 0.6583206534578473 | 0.8104494354401325 | 0.4953801665282095 |
| 0.4280186975196270 | 0.5429993495149307 | 0.6405159650186519 |
| 0.5186337888940445 | 0.7021711962792389 | 0.6806284225437339 |
| 0.4504974313329889 | 0.5984126963877471 | 0.7499424236428679 |
| 0.3637501335777595 | 0.7201694347301464 | 0.7116118174811947 |
| 0.2745899447932852 | 0.5778706188210235 | 0.7122465999385865 |
| 0.4931383432813763 | 0.5364354033131882 | 0.6391176407861641 |

\*+CH<sub>3</sub>CH<sub>2</sub>OH , Energy without entropy=-549.10 eV

1.0000000000000000

|                     |                     |                     |
|---------------------|---------------------|---------------------|
| 14.2659997940000007 | 0.0000000000000000  | 0.0000000000000000  |
| -7.1329998970000004 | 12.3547182319999997 | 0.0000000000000000  |
| 0.0000000000000000  | 0.0000000000000000  | 18.0000000000000000 |

|   |    |    |   |   |
|---|----|----|---|---|
| B | C  | N  | O | H |
| 4 | 26 | 32 | 1 | 6 |

Direct

|                    |                    |                    |
|--------------------|--------------------|--------------------|
| 0.3897098485563605 | 0.5982114738040013 | 0.5416482704614575 |
| 0.2136990652766224 | 0.5999787887079936 | 0.5423821105797041 |
| 0.3882339495584149 | 0.7737249059983480 | 0.5401437359330276 |
| 0.3311434161286470 | 0.6576383925341940 | 0.5757141051985084 |
| 0.0445099599268434 | 0.2662152622540800 | 0.4836451825550606 |
| 0.2175521396492207 | 0.2673494329724128 | 0.4712073410444849 |

|                    |                    |                    |
|--------------------|--------------------|--------------------|
| 0.2162515603614090 | 0.4320574889196294 | 0.5090068815624014 |
| 0.0458855825731521 | 0.4278596727191653 | 0.4981535150479047 |
| 0.0519505302719732 | 0.1088979475533097 | 0.4681223983174340 |
| 0.5592406918802234 | 0.2727042818087320 | 0.4730894769521565 |
| 0.7186869717126307 | 0.2688159459158315 | 0.5188971409739385 |
| 0.7185542932469391 | 0.4393580668048251 | 0.5140862224905517 |
| 0.5587070426935281 | 0.4313123452252516 | 0.4869227910721353 |
| 0.5596458565723936 | 0.1155788228494019 | 0.4938459044945990 |
| 0.8742156005773968 | 0.4322373918816404 | 0.5189927261366583 |
| 0.0496148814971133 | 0.7674578647209321 | 0.4734433816268743 |
| 0.2172088695623701 | 0.7704341626839531 | 0.5084472136622624 |
| 0.2185149080929865 | 0.9422085256992353 | 0.4980586519856852 |
| 0.0538698514554236 | 0.9321338815047775 | 0.4736472784457200 |
| 0.0476618203957414 | 0.6060493112038822 | 0.4939591728675568 |
| 0.3811413782321859 | 0.9424294697539958 | 0.5017575692956480 |
| 0.5550723345804282 | 0.7709518567988071 | 0.5075737323653318 |
| 0.7174565903464841 | 0.7664542948706845 | 0.4708275645171469 |
| 0.7168315293893839 | 0.9389303415010923 | 0.4678769396186016 |
| 0.5561747916118630 | 0.9383562499324074 | 0.4883904089210507 |
| 0.5564216152461652 | 0.6057838937829795 | 0.4843271383012112 |
| 0.8749147078383384 | 0.9312016157750374 | 0.4613016286673653 |
| 0.3800047219036292 | 0.4283457777941725 | 0.4847819273640034 |
| 0.3973689924329835 | 0.6142539565500482 | 0.7526646385472862 |
| 0.3790189957737565 | 0.5122308298243908 | 0.7130936920105271 |
| 0.9955451498401905 | 0.1612737091410806 | 0.4755563962451178 |
| 0.3259804758762659 | 0.3281641553587363 | 0.4633910338150024 |
| 0.1588431850972503 | 0.4858001762070198 | 0.5172529625395943 |
| 0.3281631786665195 | 0.4861116177093563 | 0.5118421983279541 |
| 0.1611596633720095 | 0.1640161989503329 | 0.4567406575342901 |
| 0.9955774338353158 | 0.3261265070862918 | 0.4799300247161690 |
| 0.9935310329373681 | 0.9904783337714691 | 0.4658180482269621 |
| 0.1618745258317219 | 0.3246482628465309 | 0.4970407133086638 |
| 0.5111407508155520 | 0.1653939643300706 | 0.4625274932786377 |
| 0.8252954017220793 | 0.3244549447961313 | 0.5290951602347890 |
| 0.6579978135041088 | 0.4871470716669528 | 0.5162842837411932 |
| 0.8254862969889831 | 0.4919542444469269 | 0.5236446813961750 |
| 0.6579876344737333 | 0.1605105152062338 | 0.5248073437117639 |
| 0.5100036456520372 | 0.3300095957668139 | 0.4604062144188679 |
| 0.4968409713232756 | 0.9954010812943614 | 0.4947103232514030 |
| 0.6661538950805845 | 0.3270470700303844 | 0.4992916897093062 |
| 0.0003416513859431 | 0.6580751505192491 | 0.4694272102490977 |
| 0.3282236354000918 | 0.8274211272539855 | 0.5131699875488070 |
| 0.1601068656081529 | 0.9894735176785240 | 0.4932256999665537 |
| 0.3273795343020327 | 0.9945417526182364 | 0.5024678869423930 |

|                    |                    |                    |
|--------------------|--------------------|--------------------|
| 0.1592463103080436 | 0.6594424526559972 | 0.5158743580522589 |
| 0.0024324165234672 | 0.8240127714166050 | 0.4598448533660651 |
| 0.9906269427709812 | 0.4896219195590009 | 0.5041414387367973 |
| 0.1634918975696805 | 0.8240101543979240 | 0.4952950920908369 |
| 0.5016162260877102 | 0.6593719808156147 | 0.5116661189548198 |
| 0.8218202873556975 | 0.8215978357377216 | 0.4597818536546978 |
| 0.6552399210635020 | 0.9856724633289585 | 0.4621259605712795 |
| 0.8203264440876843 | 0.9858865054643338 | 0.4523923497370946 |
| 0.6564185831372755 | 0.6586322091026190 | 0.4610734173147924 |
| 0.5016424895512075 | 0.8284897328013267 | 0.5135264219882808 |
| 0.4965429004025600 | 0.4892749532105330 | 0.4842070507079452 |
| 0.6633695992227376 | 0.8256372184667452 | 0.4953978321500545 |
| 0.4588189026752981 | 0.5331240489175798 | 0.6564621770443870 |
| 0.3774831467618833 | 0.4528402546879622 | 0.7531933617340694 |
| 0.3013747996508758 | 0.4746511679331219 | 0.6832340792867218 |
| 0.4739341619683725 | 0.6514587289883021 | 0.7840966575452569 |
| 0.3316873844011536 | 0.5947706150089953 | 0.7926519562032236 |
| 0.3991274525657475 | 0.6730313572904735 | 0.7122244422669005 |
| 0.5302048508383171 | 0.5775725121922739 | 0.6783218264154820 |
